# Supplementary material
Source: PubMed Central journal article supplement (PMC3567234)
Supplement: NIHMS422831-supplement-01.pdf [file NIHMS422831-supplement-01.pdf]

**Figure S1. Conditional association testing between SNPs in the *ARHGAP4-NAA10-RENBP* and *TMEM187-IRAK1-MECP2* region.** Five SNPs in the *ARHGAP4-NAA10-RENBP* region and six SNPs in the *TMEM187-IRAK1-MECP2* region were named as group 1 and group 2, respectively. The dashed line represents the significance level of  $P=0.05$ .

**Figure S2. Conditional association testing among six SLE-associated SNPs in the *TMEM187-IRAK1-MECP2* region.** Pairwisely LD value ( $r^2$ ) of the 6 SLE-associated SNPs are depicted in the upper panel.  $P$  value of other 5 SNPs after conditioning on the SNP shown as "\*" are shown in the lower panel. ND represents that these two SNPs were non-distinguishable in conditional testing.

Type of file: figure

Label: S1

Filename: FigureS1.tif

- *P* value detected in association test
- *P* value after conditioning on 5 SNPs in group 1
- *P* value after conditioning on 6 SNPs in group 2

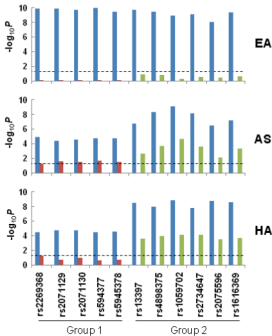

Type of file: figure

Label: S2

Filename: FigureS2.tif

EA

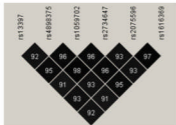

P after conditioning on

|           | rs13397 | rs4898375 | rs1059702 | rs2734647 | rs2075596 | rs1616369 |
|-----------|---------|-----------|-----------|-----------|-----------|-----------|
| rs13397   | *       | ND        | ND        | ND        | ND        | ND        |
| rs4898375 | ND      | *         | ND        | ND        | ND        | ND        |
| rs1059702 | ND      | ND        | *         | ND        | ND        | ND        |
| rs2734647 | ND      | ND        | ND        | *         | ND        | ND        |
| rs2075596 | ND      | ND        | ND        | ND        | *         | ND        |
| rs1616369 | ND      | ND        | ND        | ND        | ND        | *         |

AA

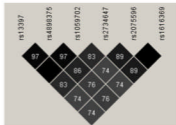

P after conditioning on

|           | rs13397 | rs4898375 | rs1059702 | rs2734647 | rs2075596 | rs1616369 |
|-----------|---------|-----------|-----------|-----------|-----------|-----------|
| rs13397   | *       | ND        | ND        | ND        | 0.94      | 0.99      |
| rs4898375 | ND      | *         | ND        | ND        | ND        | ND        |
| rs1059702 | ND      | ND        | *         | ND        | ND        | ND        |
| rs2734647 | ND      | ND        | ND        | *         | ND        | ND        |
| rs2075596 | 0.18    | ND        | ND        | ND        | *         | ND        |
| rs1616369 | 0.13    | ND        | ND        | ND        | ND        | *         |

HA

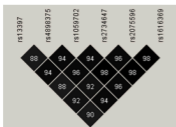

P after conditioning on

|           | rs13397 | rs4898375 | rs1059702 | rs2734647 | rs2075596 | rs1616369 |
|-----------|---------|-----------|-----------|-----------|-----------|-----------|
| rs13397   | *       | 0.038     | 0.92      | 0.022     | 0.32      | 0.55      |
| rs4898375 | 0.89    | *         | 0.19      | 0.73      | 0.87      | 0.52      |
| rs1059702 | 0.27    | 4.0E-03   | *         | 1.6E-03   | 0.25      | 0.27      |
| rs2734647 | 0.54    | 0.37      | 0.085     | *         | 0.66      | 0.73      |
| rs2075596 | 0.74    | 0.026     | 0.77      | 0.036     | *         | ND        |
| rs1616369 | 0.49    | 0.011     | 0.79      | 0.053     | ND        | *         |

AS

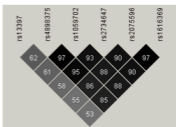

P after conditioning on

|           | rs13397 | rs4898375 | rs1059702 | rs2734647 | rs2075596 | rs1616369 |
|-----------|---------|-----------|-----------|-----------|-----------|-----------|
| rs13397   | *       | 0.45      | 0.53      | 0.30      | 0.012     | 0.20      |
| rs4898375 | 1.8E-03 | *         | ND        | 0.89      | 0.008     | 0.021     |
| rs1059702 | 5.7E-04 | ND        | *         | 0.15      | 5.9E-04   | 7.5E-04   |
| rs2734647 | 0.014   | 0.15      | 0.94      | *         | 2.6E-04   | 0.10      |
| rs2075596 | 0.020   | 0.47      | 0.24      | 0.043     | *         | ND        |
| rs1616369 | 0.024   | 0.55      | 0.12      | 0.90      | ND        | *         |

Type of file: table

Label: S1

Filename: TableS1.doc

**Table S1. Allelic association of 173 Xq28 SNPs with SLE in European Americans**

| Type | SNP                    | Position  | Gene           | Tested allele | Frequency     |                | P              | OR              | P <sub>c</sub> |
|------|------------------------|-----------|----------------|---------------|---------------|----------------|----------------|-----------------|----------------|
|      |                        |           |                |               | SLE (n=3,915) | CTRL (n=3,462) |                |                 |                |
| G    | rs12156710             | 153150791 | <i>L1CAM</i>   | T             | 27.9%         | 25.3%          | 6.3E-03        | 1.12[1.03-1.21] | 0.01           |
| I    | rs41311376             | 153150929 | <i>L1CAM</i>   | A             | 27.9%         | 25.2%          | 3.1E-03        | 1.13[1.04-1.22] | 0.09           |
| I    | rs73627240             | 153151939 |                | T             | 25.9%         | 23.4%          | 2.3E-03        | 1.14[1.05-1.24] | 0.10           |
| I    | rs73627241             | 153152126 |                | T             | 26.0%         | 23.4%          | 2.2E-03        | 1.14[1.05-1.24] | 0.11           |
| I    | rs5945168              | 153152760 |                | T             | 26.0%         | 23.5%          | 2.4E-03        | 1.14[1.05-1.24] | 0.11           |
| I    | rs5987175              | 153153839 |                | T             | 27.9%         | 25.2%          | 2.9E-03        | 1.13[1.04-1.23] | 0.09           |
| I    | rs4898455              | 153154887 |                | G             | 2.1%          | 1.8%           | 0.783          | 1.04[0.80-1.34] | --             |
| I    | rs4898456              | 153155214 |                | T             | 26.0%         | 23.5%          | 2.8E-03        | 1.14[1.05-1.23] | 0.10           |
| I    | rs12380966             | 153155987 |                | T             | 2.1%          | 1.8%           | 0.748          | 1.04[0.81-1.35] | --             |
| I    | rs5945365              | 153156390 |                | C             | 26.0%         | 23.5%          | 2.8E-03        | 1.14[1.05-1.23] | 0.10           |
| I    | rs7060775              | 153157066 |                | C             | 1.4%          | 1.0%           | 0.156          | 1.27[0.91-1.77] | --             |
| G    | rs7065317              | 153157722 |                | A             | 2.3%          | 2.1%           | 0.886          | 1.02[0.80-1.29] | --             |
| G    | rs4898457              | 153158356 |                | A             | 28.3%         | 25.3%          | 5.4E-04        | 1.15[1.06-1.25] | 0.39           |
| I    | rs5945169              | 153162037 |                | C             | 26.4%         | 23.7%          | 8.7E-04        | 1.15[1.06-1.25] | 0.11           |
| I    | rs7052686              | 153162462 |                | T             | 28.3%         | 25.4%          | 1.1E-03        | 1.14[1.06-1.24] | 0.08           |
| I    | rs5945367              | 153164342 |                | T             | 28.3%         | 25.3%          | 7.0E-04        | 1.15[1.06-1.25] | 0.08           |
| I    | rs5945368              | 153165516 |                | T             | 26.3%         | 23.5%          | 4.7E-04        | 1.16[1.07-1.26] | 0.11           |
| I    | rs5945369              | 153165804 |                | T             | 26.3%         | 23.5%          | 4.4E-04        | 1.16[1.07-1.26] | 0.11           |
| I    | rs5945370              | 153165883 |                | T             | 26.3%         | 23.5%          | 4.4E-04        | 1.16[1.07-1.26] | 0.11           |
| I    | rs2872601              | 153166009 |                | A             | 26.4%         | 23.5%          | 4.0E-04        | 1.16[1.07-1.26] | 0.10           |
| G    | rs4898458              | 153167690 |                | G             | 29.1%         | 26.2%          | 1.2E-03        | 1.14[1.05-1.23] | 0.11           |
| I    | rs3761529              | 153168407 | <i>AVPR2</i>   | A             | 28.6%         | 25.8%          | 1.7E-03        | 1.14[1.05-1.23] | 0.10           |
| I    | rs3761528              | 153168449 | <i>AVPR2</i>   | C             | 29.6%         | 26.5%          | 3.9E-04        | 1.16[1.07-1.25] | 0.24           |
| G    | rs3761527              | 153168624 | <i>AVPR2</i>   | C             | 32.2%         | 29.4%          | 2.5E-03        | 1.13[1.04-1.22] | 0.26           |
| G    | rs762655               | 153169480 | <i>AVPR2</i>   | C             | 32.6%         | 30.0%          | 6.7E-03        | 1.11[1.03-1.20] | 0.14           |
| G    | rs5201                 | 153171993 | <i>AVPR2</i>   | G             | 32.6%         | 29.7%          | 2.2E-03        | 1.13[1.04-1.22] | 0.09           |
| G    | rs2070097              | 153176254 | <i>ARHGAP4</i> | G             | 42.3%         | 38.8%          | <b>1.1E-04</b> | 1.15[1.07-1.24] | 0.54           |
| I    | X-153180466            | 153180466 | <i>ARHGAP4</i> | T             | 1.7%          | 1.6%           | 0.608          | 1.08[0.81-1.43] | --             |
| I    | X-153180638            | 153180638 | <i>ARHGAP4</i> | A             | 1.7%          | 2.1%           | 0.159          | 0.83[0.64-1.08] | --             |
| I    | X-153184816            | 153184816 | <i>ARHGAP4</i> | A             | 2.1%          | 2.4%           | 0.336          | 0.88[0.70-1.14] | --             |
| I    | rs2269368 <sup>c</sup> | 153189819 | <i>ARHGAP4</i> | T             | 18.1%         | 13.7%          | <b>1.3E-10</b> | 1.38[1.25-1.52] | 0.98           |
| I    | rs4243543              | 153195884 | <i>NAA10</i>   | A             | 2.9%          | 3.2%           | 0.316          | 0.90[0.73-1.11] | --             |
| G    | rs2071129              | 153195921 | <i>NAA10</i>   | G             | 18.5%         | 14.1%          | <b>1.3E-10</b> | 1.38[1.25-1.52] | 0.87           |
| I    | rs2071130              | 153196057 | <i>NAA10</i>   | C             | 18.1%         | 13.8%          | <b>2.0E-10</b> | 1.37[1.25-1.52] | 0.99           |
| I    | rs2269370              | 153196429 | <i>NAA10</i>   | A             | 18.1%         | 13.8%          | <b>1.7E-10</b> | 1.38[1.25-1.52] | 0.86           |
| I    | rs1557501              | 153197130 | <i>NAA10</i>   | T             | 21.3%         | 17.4%          | <b>1.2E-07</b> | 1.28[1.17-1.40] | 0.87           |
| I    | rs3747308              | 153200020 | <i>NAA10</i>   | C             | 18.2%         | 13.9%          | <b>3.9E-10</b> | 1.37[1.24-1.51] | 0.84           |
| G    | rs5945377              | 153201293 | <i>RENBP</i>   | C             | 18.4%         | 14.0%          | <b>8.4E-11</b> | 1.38[1.25-1.52] | 0.86           |
| I    | rs5945378              | 153201441 | <i>RENBP</i>   | G             | 18.2%         | 14.0%          | <b>3.6E-10</b> | 1.37[1.24-1.51] | 0.79           |
| I    | rs4898463              | 153203390 | <i>RENBP</i>   | G             | 20.7%         | 17.1%          | <b>2.4E-07</b> | 1.28[1.16-1.40] | 0.72           |
| G    | rs2156929              | 153205370 | <i>RENBP</i>   | A             | 5.3%          | 5.8%           | 0.228          | 0.91[0.78-1.06] | --             |
| I    | rs78377269             | 153207037 | <i>RENBP</i>   | T             | 2.2%          | 2.6%           | 0.268          | 0.88[0.70-1.11] | --             |
| I    | rs2269372              | 153207545 | <i>RENBP</i>   | G             | 22.1%         | 18.1%          | <b>5.6E-08</b> | 1.28[1.17-1.40] | 0.70           |
| I    | rs2269373              | 153207925 | <i>RENBP</i>   | A             | 22.3%         | 18.2%          | <b>6.1E-08</b> | 1.28[1.17-1.40] | 0.63           |
| I    | rs4898465              | 153208140 | <i>RENBP</i>   | C             | 21.9%         | 17.9%          | <b>8.7E-08</b> | 1.28[1.17-1.40] | 0.46           |

| Type | SNP         | Position  | Gene           | Tested allele | Frequency     |                | P              | Type            | SNP  |
|------|-------------|-----------|----------------|---------------|---------------|----------------|----------------|-----------------|------|
|      |             |           |                |               | SLE (n=3,915) | CTRL (n=3,462) |                |                 |      |
| I    | rs3027869   | 153211538 |                | A             | 22.0%         | 17.9%          | <b>5.9E-08</b> | 1.28[1.17-1.41] | 0.44 |
| I    | rs762656    | 153211652 |                | G             | 22.4%         | 18.3%          | <b>3.6E-08</b> | 1.29[1.18-1.41] | 0.71 |
| I    | rs2071132   | 153216036 | <i>HCFC1</i>   | A             | 22.5%         | 18.3%          | <b>3.6E-08</b> | 1.29[1.18-1.41] | 0.71 |
| I    | rs3027878   | 153218365 | <i>HCFC1</i>   | A             | 19.5%         | 14.9%          | <b>3.1E-10</b> | 1.36[1.24-1.50] | ND   |
| I    | rs762653    | 153218920 | <i>HCFC1</i>   | A             | 19.5%         | 14.9%          | <b>2.9E-10</b> | 1.36[1.24-1.50] | ND   |
| I    | rs2071133   | 153219665 | <i>HCFC1</i>   | T             | 22.2%         | 18.1%          | <b>4.0E-08</b> | 1.29[1.18-1.41] | 0.48 |
| I    | rs1051152   | 153220360 | <i>HCFC1</i>   | G             | 22.6%         | 18.4%          | <b>2.3E-08</b> | 1.29[1.18-1.41] | 0.77 |
| I    | rs730106    | 153221657 | <i>HCFC1</i>   | C             | 22.6%         | 18.5%          | <b>2.5E-08</b> | 1.29[1.18-1.41] | 0.77 |
| I    | rs2071134   | 153222835 | <i>HCFC1</i>   | C             | 19.5%         | 15.0%          | <b>4.1E-10</b> | 1.36[1.23-1.49] | ND   |
| I    | rs17421     | 153225634 | <i>HCFC1</i>   | C             | 21.8%         | 17.6%          | <b>1.2E-07</b> | 1.28[1.17-1.40] | 0.22 |
| G    | rs632       | 153226471 | <i>HCFC1</i>   | C             | 23.0%         | 18.8%          | <b>3.5E-08</b> | 1.28[1.17-1.40] | 0.77 |
| I    | rs17422     | 153227426 | <i>HCFC1</i>   | G             | 22.6%         | 18.5%          | <b>2.5E-08</b> | 1.29[1.18-1.41] | 0.67 |
| I    | rs59607260  | 153227770 | <i>HCFC1</i>   | A             | 22.2%         | 18.1%          | <b>4.2E-08</b> | 1.29[1.18-1.41] | 0.48 |
| I    | rs2266886   | 153231352 | <i>HCFC1</i>   | C             | 22.5%         | 18.3%          | <b>2.1E-08</b> | 1.29[1.18-1.41] | 0.60 |
| I    | rs80208125  | 153238220 | <i>TMEM187</i> | G             | 22.4%         | 18.3%          | <b>2.6E-08</b> | 1.29[1.18-1.41] | 0.57 |
| I    | rs6655268   | 153238288 | <i>TMEM187</i> | C             | 22.5%         | 18.3%          | <b>2.1E-08</b> | 1.29[1.18-1.41] | 0.58 |
| I    | rs2266887   | 153239587 | <i>TMEM187</i> | T             | 22.4%         | 18.3%          | <b>2.5E-08</b> | 1.29[1.18-1.41] | 0.56 |
| I    | rs2266888   | 153239720 | <i>TMEM187</i> | A             | 22.1%         | 18.0%          | <b>3.5E-08</b> | 1.29[1.18-1.41] | 0.43 |
| I    | rs4898374   | 153241386 | <i>TMEM187</i> | T             | 22.0%         | 18.2%          | <b>1.3E-07</b> | 1.28[1.17-1.40] | 0.42 |
| I    | rs61431378  | 153243136 | <i>TMEM187</i> | T             | 22.0%         | 18.0%          | <b>6.7E-08</b> | 1.28[1.17-1.40] | 0.36 |
| I    | rs57032784  | 153243138 | <i>TMEM187</i> | A             | 22.0%         | 18.0%          | <b>6.7E-08</b> | 1.28[1.17-1.40] | 0.36 |
| I    | rs5945172   | 153243315 | <i>TMEM187</i> | G             | 22.3%         | 18.2%          | <b>3.2E-08</b> | 1.29[1.18-1.41] | 0.54 |
| I    | rs12384878  | 153245128 | <i>TMEM187</i> | G             | 22.0%         | 18.0%          | <b>4.1E-08</b> | 1.29[1.18-1.41] | 0.42 |
| I    | rs113339491 | 153245217 | <i>TMEM187</i> | A             | 21.9%         | 17.9%          | <b>3.3E-08</b> | 1.29[1.18-1.41] | 0.48 |
| I    | X-153245474 | 153245474 | <i>TMEM187</i> | T             | 2.1%          | 2.5%           | 0.355          | 0.89[0.71-1.14] | --   |
| I    | rs6643653   | 153246018 | <i>TMEM187</i> | G             | 21.1%         | 17.4%          | <b>3.8E-07</b> | 1.27[1.16-1.39] | 0.50 |
| I    | rs2266890   | 153247722 | <i>TMEM187</i> | T             | 22.0%         | 18.0%          | <b>3.1E-08</b> | 1.29[1.18-1.41] | 0.47 |
| I    | rs7350355   | 153247745 | <i>TMEM187</i> | G             | 22.2%         | 18.2%          | <b>2.5E-08</b> | 1.29[1.18-1.41] | 0.60 |
| I    | rs6571303   | 153247954 | <i>TMEM187</i> | T             | 22.1%         | 18.0%          | <b>2.5E-08</b> | 1.29[1.18-1.41] | 0.50 |
| G    | rs13397     | 153248248 | <i>TMEM187</i> | A             | 18.8%         | 14.4%          | <b>1.9E-10</b> | 1.37[1.24-1.51] | *    |
| I    | rs5945173   | 153250172 |                | A             | 22.0%         | 18.0%          | <b>3.1E-08</b> | 1.29[1.18-1.41] | 0.53 |
| I    | rs6643808   | 153252147 |                | C             | 23.0%         | 18.8%          | <b>2.5E-08</b> | 1.29[1.18-1.41] | 0.86 |
| I    | rs6643809   | 153252908 |                | C             | 23.0%         | 18.8%          | <b>1.9E-08</b> | 1.29[1.18-1.41] | 0.85 |
| I    | rs6643656   | 153254605 |                | G             | 22.0%         | 17.9%          | <b>3.1E-08</b> | 1.29[1.18-1.41] | 0.52 |
| I    | rs6655269   | 153256435 |                | A             | 21.4%         | 17.3%          | <b>9.3E-09</b> | 1.31[1.19-1.43] | 0.98 |
| I    | rs5986947   | 153256505 |                | C             | 21.5%         | 17.4%          | <b>6.7E-09</b> | 1.31[1.2-1.44]  | 0.98 |
| I    | rs12353692  | 153260032 |                | G             | 22.6%         | 18.4%          | <b>1.3E-08</b> | 1.3[1.19-1.42]  | 0.81 |
| I    | rs5945384   | 153260414 |                | C             | 22.6%         | 18.4%          | <b>1.4E-08</b> | 1.3[1.19-1.42]  | 0.81 |
| I    | rs11156610  | 153260745 |                | C             | 22.6%         | 18.5%          | <b>1.2E-08</b> | 1.3[1.19-1.42]  | 0.81 |
| I    | X-153265345 | 153265345 |                | G             | 3.2%          | 3.5%           | 0.593          | 0.94[0.78-1.15] | --   |
| I    | rs11795678  | 153265728 |                | G             | 22.7%         | 18.5%          | <b>1.0E-08</b> | 1.30[1.19-1.42] | 0.77 |
| I    | rs5986948   | 153266172 |                | T             | 22.3%         | 18.3%          | <b>5.3E-08</b> | 1.28[1.17-1.40] | 0.97 |
| I    | rs5945386   | 153269755 |                | G             | 22.4%         | 18.4%          | <b>3.8E-08</b> | 1.29[1.18-1.41] | 0.73 |
| G    | rs4898375   | 153273226 |                | A             | 19.3%         | 14.8%          | <b>3.9E-10</b> | 1.36[1.23-1.49] | *    |
| G    | rs633       | 153274228 |                | C             | 23.8%         | 19.8%          | <b>1.5E-07</b> | 1.26[1.16-1.37] | 0.94 |
| I    | rs12400188  | 153275075 |                | G             | 23.5%         | 19.5%          | <b>1.2E-07</b> | 1.26[1.16-1.38] | 0.82 |
| G    | rs3027898   | 153275890 |                | C             | 23.8%         | 19.9%          | <b>3.4E-07</b> | 1.25[1.15-1.36] | 0.77 |



| Type | SNP                    | Position  | Gene  | Tested allele | Frequency     |                | P              | Type            | SNP  |
|------|------------------------|-----------|-------|---------------|---------------|----------------|----------------|-----------------|------|
|      |                        |           |       |               | SLE (n=3,915) | CTRL (n=3,462) |                |                 |      |
| I    | rs731642               | 153277507 | IRAK1 | A             | 23.1%         | 19.1%          | <b>1.0E-07</b> | 1.27[1.16-1.39] | 0.92 |
| G    | rs2239673 <sup>a</sup> | 153277889 | IRAK1 | C             | 23.6%         | 19.5%          | <b>1.3E-07</b> | 1.26[1.16-1.38] | 0.96 |
| I    | rs763737 <sup>a</sup>  | 153278307 | IRAK1 | G             | 23.5%         | 19.5%          | <b>7.0E-08</b> | 1.27[1.16-1.39] | 0.99 |
| I    | rs1059703              | 153278829 | IRAK1 | G             | 19.5%         | 15.1%          | <b>4.9E-10</b> | 1.35[1.23-1.48] | ND   |
| I    | rs5945174 <sup>a</sup> | 153279858 | IRAK1 | G             | 23.5%         | 19.5%          | <b>6.9E-08</b> | 1.27[1.16-1.39] | 0.98 |
| G    | rs7061789 <sup>a</sup> | 153280475 | IRAK1 | G             | 23.6%         | 19.5%          | <b>1.3E-07</b> | 1.26[1.16-1.38] | 0.96 |
| G    | rs1059702              | 153284192 | IRAK1 | A             | 18.9%         | 14.6%          | <b>1.2E-09</b> | 1.35[1.22-1.48] | *    |
| G    | rs1059701              | 153284483 | IRAK1 | G             | 24.0%         | 19.7%          | <b>3.9E-08</b> | 1.27[1.17-1.39] | 0.75 |
| G    | rs3027915              | 153287962 | MECP2 | G             | 3.2%          | 2.8%           | 0.485          | 1.08[0.88-1.32] | --   |
| G    | rs2734647              | 153292180 | MECP2 | T             | 19.2%         | 14.9%          | <b>7.8E-10</b> | 1.35[1.23-1.48] | *    |
| I    | rs3850326              | 153297010 | MECP2 | C             | 3.9%          | 4.2%           | 0.469          | 0.94[0.78-1.12] | --   |
| G    | rs2075596 <sup>b</sup> | 153297392 | MECP2 | A             | 18.4%         | 14.4%          | <b>9.0E-09</b> | 1.33[1.21-1.46] | *    |
| I    | rs3027932              | 153298434 | MECP2 | G             | 3.8%          | 4.1%           | 0.576          | 0.95[0.79-1.14] | --   |
| I    | rs3027933 <sup>b</sup> | 153298874 | MECP2 | G             | 18.5%         | 14.4%          | <b>3.0E-09</b> | 1.34[1.22-1.48] | ND   |
| I    | rs4898467              | 153299924 | MECP2 | G             | 22.5%         | 18.6%          | <b>1.4E-07</b> | 1.27[1.16-1.39] | 0.93 |
| I    | X-153299971            | 153299971 | MECP2 | T             | 3.6%          | 3.9%           | 0.548          | 0.94[0.79-1.14] | --   |
| I    | X-153300033            | 153300033 | MECP2 | A             | 3.6%          | 3.9%           | 0.548          | 0.94[0.79-1.14] | --   |
| I    | rs5987194              | 153301467 | MECP2 | C             | 18.6%         | 14.4%          | <b>2.7E-09</b> | 1.34[1.22-1.48] | ND   |
| I    | rs1734790              | 153301653 | MECP2 | C             | 22.5%         | 18.6%          | <b>1.4E-07</b> | 1.27[1.16-1.39] | 0.93 |
| I    | rs5987195              | 153301742 | MECP2 | G             | 3.6%          | 3.9%           | 0.548          | 0.94[0.78-1.14] | --   |
| I    | X-153301853            | 153301853 | MECP2 | T             | 3.1%          | 3.4%           | 0.430          | 0.93[0.76-1.12] | --   |
| I    | rs5987196              | 153301935 | MECP2 | A             | 3.6%          | 3.9%           | 0.548          | 0.94[0.78-1.14] | --   |
| I    | X-153302636            | 153302636 | MECP2 | C             | 4.4%          | 4.7%           | 0.538          | 0.95[0.80-1.12] | --   |
| G    | rs3027935              | 153304468 | MECP2 | T             | 5.8%          | 6.5%           | 0.121          | 0.89[0.77-1.03] | --   |
| I    | rs7887323              | 153305048 | MECP2 | C             | 4.4%          | 4.7%           | 0.536          | 0.95[0.80-1.12] | --   |
| I    | rs909131               | 153308227 | MECP2 | G             | 23.4%         | 19.6%          | <b>4.1E-07</b> | 1.25[1.15-1.37] | 0.91 |
| I    | rs3027939              | 153310578 | MECP2 | G             | 4.4%          | 4.8%           | 0.383          | 0.93[0.79-1.10] | --   |
| I    | rs5987198              | 153311352 | MECP2 | A             | 4.4%          | 4.8%           | 0.383          | 0.93[0.79-1.10] | --   |
| G    | rs17435 <sup>b</sup>   | 153311980 | MECP2 | T             | 24.0%         | 19.8%          | <b>3.6E-08</b> | 1.28[1.17-1.39] | 0.67 |
| G    | rs7050901              | 153314310 | MECP2 | T             | 4.1%          | 4.4%           | 0.562          | 0.95[0.80-1.13] | --   |
| I    | rs3027944              | 153316062 | MECP2 | G             | 4.5%          | 4.8%           | 0.454          | 0.94[0.79-1.11] | --   |
| G    | rs1624766 <sup>b</sup> | 153317154 | MECP2 | C             | 23.2%         | 18.9%          | <b>5.0E-08</b> | 1.28[1.17-1.40] | 0.77 |
| I    | rs5987199              | 153319087 | MECP2 | G             | 4.5%          | 4.8%           | 0.486          | 0.94[0.80-1.11] | --   |
| I    | rs5987200              | 153319119 | MECP2 | C             | 4.5%          | 4.8%           | 0.486          | 0.94[0.80-1.11] | --   |
| I    | rs112643842            | 153319757 | MECP2 | T             | 4.5%          | 4.8%           | 0.507          | 0.95[0.80-1.12] | --   |
| I    | rs112812100            | 153319857 | MECP2 | C             | 4.5%          | 4.8%           | 0.507          | 0.95[0.80-1.12] | --   |
| I    | rs12559567             | 153321043 | MECP2 | A             | 4.5%          | 4.8%           | 0.458          | 0.94[0.79-1.11] | --   |
| G    | rs7884370              | 153322881 | MECP2 | G             | 4.6%          | 4.9%           | 0.499          | 0.94[0.80-1.11] | --   |
| G    | rs1734787 <sup>b</sup> | 153325446 | MECP2 | C             | 19.1%         | 14.7%          | <b>6.4E-10</b> | 1.35[1.23-1.49] | ND   |
| I    | rs1616369              | 153326464 | MECP2 | A             | 19.0%         | 14.6%          | <b>4.2E-10</b> | 1.36[1.23-1.49] | *    |
| G    | rs5987201              | 153330042 | MECP2 | T             | 4.6%          | 4.9%           | 0.500          | 0.94[0.80-1.11] | --   |
| G    | rs34834543             | 153330719 | MECP2 | T             | 4.6%          | 4.9%           | 0.499          | 0.94[0.80-1.11] | --   |
| I    | rs1734791 <sup>b</sup> | 153330920 | MECP2 | T             | 19.2%         | 14.8%          | <b>3.4E-10</b> | 1.36[1.23-1.49] | ND   |
| I    | rs5986950              | 153331053 | MECP2 | G             | 4.5%          | 4.8%           | 0.475          | 0.94[0.80-1.11] | --   |
| I    | rs1734789              | 153331463 | MECP2 | G             | 23.7%         | 19.6%          | <b>6.9E-08</b> | 1.27[1.16-1.38] | 0.91 |
| I    | rs4011489              | 153332155 | MECP2 | C             | 4.5%          | 4.8%           | 0.475          | 0.94[0.80-1.11] | --   |

| Type | SNP                    | Position  | Gene  | Tested allele | Frequency     |                | P              | Type            | SNP  |
|------|------------------------|-----------|-------|---------------|---------------|----------------|----------------|-----------------|------|
|      |                        |           |       |               | SLE (n=3,915) | CTRL (n=3,462) |                |                 |      |
| I    | rs111398632            | 153334146 | MECP2 | A             | 3.7%          | 4.0%           | 0.424          | 0.93[0.77-1.12] | --   |
| I    | rs111881122            | 153334181 | MECP2 | T             | 3.7%          | 4.0%           | 0.424          | 0.93[0.77-1.12] | --   |
| I    | rs7052196              | 153334432 | MECP2 | T             | 3.7%          | 4.0%           | 0.424          | 0.93[0.77-1.12] | --   |
| I    | rs7877644              | 153338287 | MECP2 | A             | 3.7%          | 4.0%           | 0.425          | 0.93[0.77-1.12] | --   |
| I    | rs113881950            | 153340281 | MECP2 | A             | 3.7%          | 4.0%           | 0.425          | 0.93[0.77-1.12] | --   |
| I    | rs1734792 <sup>b</sup> | 153341060 | MECP2 | A             | 19.2%         | 14.8%          | <b>3.1E-10</b> | 1.36[1.24-1.49] | ND   |
| G    | rs11156611             | 153344174 | MECP2 | A             | 4.6%          | 4.9%           | 0.450          | 0.94[0.79-1.11] | --   |
| I    | rs113162152            | 153346888 | MECP2 | T             | 3.7%          | 4.0%           | 0.436          | 0.93[0.77-1.12] | --   |
| I    | rs5987204              | 153347588 | MECP2 | A             | 3.7%          | 4.0%           | 0.436          | 0.93[0.77-1.12] | --   |
| G    | rs2239464 <sup>b</sup> | 153348431 | MECP2 | A             | 23.1%         | 19.1%          | <b>8.4E-08</b> | 1.27[1.16-1.39] | 0.79 |
| G    | rs5987205              | 153348586 | MECP2 | G             | 3.7%          | 4.1%           | 0.279          | 0.90[0.75-1.09] | --   |
| G    | rs5986954              | 153349295 | MECP2 | G             | 3.5%          | 3.7%           | 0.283          | 0.90[0.74-1.09] | --   |
| I    | rs5945393              | 153349428 | MECP2 | G             | 22.9%         | 18.8%          | <b>3.5E-08</b> | 1.28[1.17-1.40] | 0.84 |
| I    | rs5986955              | 153349494 | MECP2 | G             | 3.7%          | 4.0%           | 0.466          | 0.93[0.78-1.12] | --   |
| I    | rs12390791             | 153355759 | MECP2 | A             | 3.7%          | 4.0%           | 0.487          | 0.94[0.78-1.13] | --   |
| G    | rs12390885             | 153356015 | MECP2 | A             | 3.7%          | 4.1%           | 0.314          | 0.91[0.76-1.09] | --   |
| G    | rs35609266             | 153358115 | MECP2 | T             | 3.8%          | 4.1%           | 0.338          | 0.91[0.76-1.10] | --   |
| I    | rs28458447             | 153359700 | MECP2 | C             | 4.5%          | 4.7%           | 0.648          | 0.96[0.81-1.14] | --   |
| I    | rs33976460             | 153360669 | MECP2 | A             | 3.7%          | 4.0%           | 0.523          | 0.94[0.78-1.13] | --   |
| I    | rs5987206              | 153366814 |       | C             | 19.2%         | 14.8%          | <b>2.5E-10</b> | 1.36[1.24-1.50] | ND   |
| I    | X-153366830            | 153366830 |       | C             | 4.5%          | 4.7%           | 0.648          | 0.96[0.81-1.14] | --   |
| I    | rs28781958             | 153366846 |       | T             | 4.5%          | 4.7%           | 0.648          | 0.96[0.81-1.14] | --   |
| I    | rs28876812             | 153366850 |       | T             | 4.5%          | 4.7%           | 0.648          | 0.96[0.81-1.14] | --   |
| I    | rs5987207              | 153366927 |       | C             | 4.5%          | 4.7%           | 0.648          | 0.96[0.81-1.14] | --   |
| I    | rs5986956              | 153367689 |       | A             | 3.7%          | 4.0%           | 0.523          | 0.94[0.78-1.13] | --   |
| I    | rs111354059            | 153368909 |       | G             | 4.5%          | 4.7%           | 0.648          | 0.96[0.81-1.14] | --   |
| I    | rs112724831            | 153368930 |       | G             | 4.5%          | 4.7%           | 0.648          | 0.96[0.81-1.14] | --   |
| I    | rs5987208              | 153369611 |       | A             | 3.7%          | 4.0%           | 0.523          | 0.94[0.78-1.13] | --   |
| I    | rs5986957              | 153372505 |       | T             | 19.2%         | 14.7%          | <b>1.8E-10</b> | 1.37[1.24-1.51] | ND   |
| I    | rs7058768              | 153372519 |       | G             | 3.7%          | 4.0%           | 0.523          | 0.94[0.78-1.13] | --   |
| I    | X-153372840            | 153372840 |       | T             | 3.7%          | 4.0%           | 0.523          | 0.94[0.78-1.14] | --   |
| I    | rs73629109             | 153373272 |       | G             | 3.8%          | 4.0%           | 0.586          | 0.95[0.79-1.14] | --   |
| I    | rs5987211              | 153376055 |       | T             | 4.5%          | 4.7%           | 0.648          | 0.96[0.81-1.14] | --   |
| I    | rs2872736              | 153376436 |       | C             | 23.7%         | 19.5%          | <b>3.4E-08</b> | 1.28[1.17-1.39] | 0.89 |
| I    | rs5987212              | 153378375 |       | T             | 18.2%         | 14.0%          | <b>1.1E-09</b> | 1.36[1.23-1.50] | ND   |

If *P* reached the Bonferroni-corrected significance level of  $2.9 \times 10^{-4}$ , it is highlighted in bold and italic.

Type of file: table

Label: S2

Filename: TableS2.doc

**Table S2. Allelic association of 157 Xq28 SNPs with SLE in Asians**

| Type | SNP                    | Position  | Gene           | Tested allele | Frequency     |                | P              | OR              | P <sub>c</sub> |
|------|------------------------|-----------|----------------|---------------|---------------|----------------|----------------|-----------------|----------------|
|      |                        |           |                |               | SLE (n=1,262) | CTRL (n=1,256) |                |                 |                |
| I    | rs4646265              | 153137108 | <i>L1CAM</i>   | G             | 2.2%          | 2.9%           | 0.110          | 0.75[0.52-1.07] | --             |
| I    | rs4243542              | 153139884 | <i>L1CAM</i>   | A             | 2.2%          | 2.9%           | 0.110          | 0.75[0.52-1.07] | --             |
| I    | rs6655266              | 153145787 | <i>L1CAM</i>   | C             | 3.1%          | 3.9%           | 0.164          | 0.80[0.59-1.09] | --             |
| I    | rs5945360              | 153146216 | <i>L1CAM</i>   | G             | 3.1%          | 3.9%           | 0.164          | 0.80[0.59-1.09] | --             |
| G    | rs12156710             | 153150791 | <i>L1CAM</i>   | T             | 73.2%         | 70.2%          | 0.022          | 1.16[1.02-1.31] | 0.62           |
| I    | rs41311376             | 153150929 | <i>L1CAM</i>   | A             | 75.0%         | 72.2%          | 0.040          | 1.14[1.01-1.30] | 0.70           |
| I    | rs73627240             | 153151939 |                | T             | 71.8%         | 68.2%          | 8.9E-03        | 1.18[1.04-1.33] | 0.44           |
| I    | rs73627241             | 153152126 |                | T             | 71.8%         | 68.2%          | 8.9E-03        | 1.18[1.04-1.33] | 0.44           |
| I    | rs5945168              | 153152760 |                | T             | 71.7%         | 68.2%          | 9.5E-03        | 1.18[1.04-1.33] | 0.44           |
| I    | rs5987175              | 153153839 |                | T             | 75.0%         | 72.3%          | 0.040          | 1.14[1.01-1.30] | 0.74           |
| I    | rs4898455              | 153154887 |                | G             | 3.3%          | 4.2%           | 0.086          | 0.77[0.57-1.04] | --             |
| I    | rs4898456              | 153155214 |                | T             | 71.7%         | 68.2%          | 0.010          | 1.17[1.04-1.33] | 0.43           |
| I    | rs12380966             | 153155987 |                | T             | 3.3%          | 4.2%           | 0.086          | 0.77[0.57-1.04] | --             |
| I    | rs5945365              | 153156390 |                | C             | 71.7%         | 68.2%          | 0.010          | 1.17[1.04-1.33] | 0.40           |
| I    | rs7060775              | 153157066 |                | C             | 3.3%          | 4.2%           | 0.086          | 0.77[0.57-1.04] | --             |
| G    | rs7065317              | 153157722 |                | A             | 3.3%          | 4.3%           | 0.065          | 0.76[0.56-1.02] | --             |
| G    | rs4898457              | 153158356 |                | A             | 74.5%         | 71.5%          | 0.025          | 1.16[1.02-1.31] | 0.55           |
| I    | rs5945169              | 153162037 |                | C             | 71.8%         | 68.0%          | 6.0E-03        | 1.19[1.05-1.34] | 0.31           |
| I    | rs7052686              | 153162462 |                | T             | 74.8%         | 71.9%          | 0.027          | 1.15[1.02-1.31] | 0.69           |
| I    | rs7886319              | 153162986 |                | G             | 74.9%         | 72.0%          | 0.031          | 1.15[1.01-1.31] | 0.71           |
| I    | rs5987179              | 153163197 |                | G             | 74.9%         | 72.0%          | 0.031          | 1.15[1.01-1.31] | 0.71           |
| I    | rs5945367              | 153164342 |                | T             | 74.8%         | 71.9%          | 0.030          | 1.15[1.01-1.31] | 0.66           |
| I    | rs5945368              | 153165516 |                | T             | 71.5%         | 67.7%          | 6.6E-03        | 1.18[1.05-1.34] | 0.33           |
| I    | rs5945369              | 153165804 |                | T             | 71.5%         | 67.7%          | 6.6E-03        | 1.18[1.05-1.34] | 0.33           |
| I    | rs5945370              | 153165883 |                | T             | 71.5%         | 67.7%          | 6.8E-03        | 1.18[1.05-1.34] | 0.32           |
| I    | rs2872601              | 153166009 |                | A             | 71.5%         | 67.7%          | 6.8E-03        | 1.18[1.05-1.34] | 0.32           |
| G    | rs4898458              | 153167690 |                | G             | 74.7%         | 72.0%          | 0.044          | 1.14[1.00-1.29] | 0.49           |
| I    | rs12559136             | 153168154 | <i>AVPR2</i>   | A             | 3.1%          | 4.0%           | 0.082          | 0.76[0.56-1.04] | --             |
| I    | rs3761529              | 153168407 | <i>AVPR2</i>   | A             | 74.9%         | 72.0%          | 0.035          | 1.15[1.01-1.30] | 0.66           |
| I    | rs3761528              | 153168449 | <i>AVPR2</i>   | C             | 74.9%         | 72.0%          | 0.035          | 1.15[1.01-1.30] | 0.66           |
| G    | rs3761527              | 153168624 | <i>AVPR2</i>   | C             | 74.8%         | 72.0%          | 0.039          | 1.14[1.01-1.30] | 0.63           |
| G    | rs762655               | 153169480 | <i>AVPR2</i>   | C             | 75.4%         | 72.7%          | 0.044          | 1.14[1.00-1.30] | 0.69           |
| G    | rs5201                 | 153171993 | <i>AVPR2</i>   | G             | 74.5%         | 71.8%          | 0.046          | 1.14[1.00-1.29] | 0.60           |
| G    | rs2070097              | 153176254 | <i>ARHGAP4</i> | G             | 75.4%         | 72.2%          | 0.014          | 1.18[1.03-1.34] | 0.91           |
| I    | rs7881421              | 153176959 | <i>ARHGAP4</i> | T             | 25.2%         | 28.5%          | 0.019          | 0.85[0.75-0.97] | 0.91           |
| I    | rs4898460              | 153179936 | <i>ARHGAP4</i> | A             | 24.0%         | 26.8%          | 0.038          | 0.87[0.76-0.99] | 0.85           |
| I    | rs2301144              | 153180755 | <i>ARHGAP4</i> | C             | 2.4%          | 3.5%           | 0.025          | 0.68[0.49-0.95] | 0.96           |
| I    | rs5987181              | 153182563 | <i>ARHGAP4</i> | A             | 23.8%         | 26.8%          | 0.026          | 0.86[0.75-0.98] | 0.91           |
| I    | X-153188515            | 153188515 | <i>ARHGAP4</i> | T             | 2.2%          | 2.8%           | 0.178          | 0.78[0.55-1.12] | --             |
| I    | rs2269368 <sup>c</sup> | 153189819 | <i>ARHGAP4</i> | T             | 71.6%         | 65.6%          | <b>1.3E-05</b> | 1.32[1.17-1.49] | 0.06           |
| I    | X-153191293            | 153191293 | <i>ARHGAP4</i> | T             | 1.9%          | 2.7%           | 0.074          | 0.71[0.49-1.03] | --             |
| I    | rs2071128              | 153195393 | <i>NAA10</i>   | A             | 71.5%         | 65.8%          | <b>3.6E-05</b> | 1.30[1.15-1.47] | 0.03           |
| I    | rs4243543              | 153195884 | <i>NAA10</i>   | A             | 3.3%          | 3.8%           | 0.254          | 0.84[0.62-1.14] | --             |
| G    | rs2071129              | 153195921 | <i>NAA10</i>   | G             | 71.4%         | 65.9%          | <b>4.1E-05</b> | 1.29[1.14-1.46] | 0.02           |
| I    | rs2071130              | 153196057 | <i>NAA10</i>   | C             | 71.7%         | 66.1%          | <b>2.7E-05</b> | 1.30[1.15-1.47] | 0.03           |

| Type | SNP         | Position  | Gene           | Tested allele | Frequency     |                | P              | OR              | P <sub>c</sub> |
|------|-------------|-----------|----------------|---------------|---------------|----------------|----------------|-----------------|----------------|
|      |             |           |                |               | SLE (n=1,262) | CTRL (n=1,256) |                |                 |                |
| I    | rs2071131   | 153196345 | <i>NAA10</i>   | A             | 71.5%         | 65.7%          | <b>2.4E-05</b> | 1.31[1.15-1.48] | 0.11           |
| I    | rs2269370   | 153196429 | <i>NAA10</i>   | A             | 71.7%         | 65.8%          | <b>1.3E-05</b> | 1.32[1.16-1.49] | 0.13           |
| I    | rs1557501   | 153197130 | <i>NAA10</i>   | T             | 75.3%         | 70.3%          | <b>1.4E-04</b> | 1.29[1.13-1.47] | 0.53           |
| G    | rs4898373   | 153198128 | <i>NAA10</i>   | C             | 2.7%          | 3.4%           | 0.098          | 0.76[0.55-1.05] | --             |
| I    | rs3747308   | 153200020 | <i>NAA10</i>   | C             | 71.8%         | 66.1%          | <b>1.8E-05</b> | 1.31[1.16-1.48] | 0.03           |
| G    | rs5945377   | 153201293 | <i>RENBP</i>   | C             | 71.8%         | 66.0%          | <b>1.7E-05</b> | 1.31[1.16-1.48] | 0.02           |
| I    | rs5945378   | 153201441 | <i>RENBP</i>   | G             | 71.8%         | 66.1%          | <b>2.0E-05</b> | 1.31[1.16-1.48] | 0.03           |
| I    | rs4898463   | 153203390 | <i>RENBP</i>   | G             | 75.5%         | 70.4%          | <b>1.3E-04</b> | 1.29[1.13-1.47] | 0.54           |
| G    | rs2156929   | 153205370 | <i>RENBP</i>   | A             | 3.7%          | 4.5%           | 0.128          | 0.80[0.60-1.07] | --             |
| I    | rs73640842  | 153206902 | <i>RENBP</i>   | A             | 2.6%          | 3.3%           | 0.113          | 0.76[0.54-1.07] | --             |
| G    | rs2269371   | 153207025 | <i>RENBP</i>   | C             | 2.6%          | 3.3%           | 0.098          | 0.75[0.54-1.05] | --             |
| I    | rs2269372   | 153207545 | <i>RENBP</i>   | G             | 81.6%         | 75.1%          | <b>1.0E-07</b> | 1.47[1.27-1.69] | 0.47           |
| I    | rs2269373   | 153207925 | <i>RENBP</i>   | A             | 81.6%         | 75.1%          | <b>1.0E-07</b> | 1.47[1.27-1.69] | 0.47           |
| I    | rs4898465   | 153208140 | <i>RENBP</i>   | C             | 81.6%         | 75.1%          | <b>1.2E-07</b> | 1.47[1.27-1.69] | 0.47           |
| I    | rs3027869   | 153211538 |                | A             | 81.5%         | 74.6%          | <b>2.8E-08</b> | 1.49[1.29-1.71] | 0.45           |
| I    | rs762656    | 153211652 |                | G             | 81.5%         | 74.6%          | <b>2.8E-08</b> | 1.49[1.29-1.71] | 0.45           |
| I    | X-153211712 | 153211712 |                | C             | 2.2%          | 2.2%           | 0.850          | 0.96[0.65-1.42] | --             |
| G    | rs3027871   | 153212440 |                | A             | 33.8%         | 31.5%          | 0.092          | 1.11[0.98-1.25] | --             |
| I    | rs2071132   | 153216036 | <i>HCFC1</i>   | A             | 80.9%         | 74.0%          | <b>1.3E-08</b> | 1.49[1.30-1.71] | 0.47           |
| I    | rs3027878   | 153218365 | <i>HCFC1</i>   | A             | 79.9%         | 73.1%          | <b>2.6E-08</b> | 1.47[1.29-1.69] | 0.62           |
| I    | rs762653    | 153218920 | <i>HCFC1</i>   | A             | 79.9%         | 73.1%          | <b>3.6E-08</b> | 1.47[1.28-1.68] | 0.66           |
| I    | rs2071133   | 153219665 | <i>HCFC1</i>   | T             | 80.9%         | 74.0%          | <b>1.8E-08</b> | 1.49[1.29-1.70] | 0.60           |
| I    | rs1051152   | 153220360 | <i>HCFC1</i>   | G             | 80.9%         | 74.0%          | <b>1.8E-08</b> | 1.49[1.29-1.70] | 0.60           |
| I    | rs730106    | 153221657 | <i>HCFC1</i>   | C             | 80.9%         | 74.0%          | <b>1.6E-08</b> | 1.49[1.30-1.71] | 0.60           |
| I    | rs2071134   | 153222835 | <i>HCFC1</i>   | C             | 79.9%         | 73.1%          | <b>3.2E-08</b> | 1.47[1.28-1.68] | 0.66           |
| I    | rs17421     | 153225634 | <i>HCFC1</i>   | C             | 80.9%         | 73.9%          | <b>8.6E-09</b> | 1.50[1.31-1.72] | 0.47           |
| G    | rs632       | 153226471 | <i>HCFC1</i>   | C             | 80.7%         | 73.8%          | <b>1.7E-08</b> | 1.48[1.29-1.70] | 0.55           |
| I    | rs17422     | 153227426 | <i>HCFC1</i>   | G             | 80.9%         | 73.8%          | <b>7.3E-09</b> | 1.50[1.31-1.72] | 0.42           |
| I    | rs59607260  | 153227770 | <i>HCFC1</i>   | A             | 80.9%         | 73.8%          | <b>7.3E-09</b> | 1.50[1.31-1.72] | 0.42           |
| G    | rs5945380   | 153230941 | <i>HCFC1</i>   | T             | 7.9%          | 11.0%          | <b>1.8E-04</b> | 0.68[0.56-0.83] | 0.38           |
| I    | rs2266886   | 153231352 | <i>HCFC1</i>   | C             | 80.9%         | 73.8%          | <b>7.1E-09</b> | 1.50[1.31-1.72] | 0.40           |
| I    | rs80208125  | 153238220 | <i>TMEM187</i> | G             | 80.9%         | 73.8%          | <b>5.1E-09</b> | 1.51[1.31-1.73] | 0.39           |
| I    | rs6655268   | 153238288 | <i>TMEM187</i> | C             | 80.9%         | 73.8%          | <b>5.1E-09</b> | 1.51[1.31-1.73] | 0.39           |
| I    | rs2266887   | 153239587 | <i>TMEM187</i> | T             | 80.9%         | 73.8%          | <b>5.6E-09</b> | 1.50[1.31-1.73] | 0.41           |
| I    | rs2266888   | 153239720 | <i>TMEM187</i> | A             | 80.8%         | 73.8%          | <b>6.2E-09</b> | 1.50[1.31-1.72] | 0.44           |
| G    | rs4898374   | 153241386 | <i>TMEM187</i> | T             | 80.9%         | 73.5%          | <b>1.2E-09</b> | 1.53[1.34-1.76] | 0.32           |
| I    | rs61431378  | 153243136 | <i>TMEM187</i> | T             | 80.8%         | 73.8%          | <b>5.8E-09</b> | 1.50[1.31-1.73] | 0.46           |
| I    | rs57032784  | 153243138 | <i>TMEM187</i> | A             | 80.8%         | 73.8%          | <b>5.8E-09</b> | 1.50[1.31-1.73] | 0.46           |
| I    | rs5945172   | 153243315 | <i>TMEM187</i> | G             | 80.8%         | 73.8%          | <b>5.8E-09</b> | 1.50[1.31-1.73] | 0.46           |
| I    | rs12384878  | 153245128 | <i>TMEM187</i> | G             | 80.8%         | 73.7%          | <b>6.0E-09</b> | 1.50[1.31-1.73] | 0.45           |
| I    | rs113339491 | 153245217 | <i>TMEM187</i> | A             | 80.8%         | 73.7%          | <b>6.0E-09</b> | 1.50[1.31-1.73] | 0.45           |
| I    | X-153245250 | 153245250 | <i>TMEM187</i> | T             | 2.0%          | 2.7%           | 0.107          | 0.73[0.50-1.07] | --             |
| I    | rs6643653   | 153246018 | <i>TMEM187</i> | G             | 81.9%         | 74.9%          | <b>1.5E-08</b> | 1.51[1.31-1.73] | 0.50           |
| I    | rs2266890   | 153247722 | <i>TMEM187</i> | T             | 76.8%         | 70.3%          | <b>5.4E-07</b> | 1.40[1.23-1.59] | 0.30           |
| I    | rs7350355   | 153247745 | <i>TMEM187</i> | G             | 76.8%         | 70.2%          | <b>5.0E-07</b> | 1.40[1.23-1.59] | 0.29           |
| I    | rs6571303   | 153247954 | <i>TMEM187</i> | T             | 76.7%         | 70.2%          | <b>6.9E-07</b> | 1.39[1.22-1.59] | 0.31           |
| G    | rs13397     | 153248248 | <i>TMEM187</i> | A             | 73.2%         | 66.3%          | <b>1.8E-07</b> | 1.39[1.23-1.58] | *              |

| Type | SNP                    | Position  | Gene         | Tested allele | Frequency     |                | P              | OR              | P <sub>c</sub> |
|------|------------------------|-----------|--------------|---------------|---------------|----------------|----------------|-----------------|----------------|
|      |                        |           |              |               | SLE (n=1,262) | CTRL (n=1,256) |                |                 |                |
| I    | rs5945173              | 153250172 |              | A             | 76.6%         | 70.2%          | <b>9.0E-07</b> | 1.39[1.22-1.58] | 0.31           |
| I    | rs6643808              | 153252147 |              | C             | 76.8%         | 70.6%          | <b>1.8E-06</b> | 1.38[1.21-1.57] | 0.35           |
| I    | rs6643809              | 153252908 |              | C             | 76.9%         | 70.6%          | <b>1.5E-06</b> | 1.38[1.21-1.57] | 0.34           |
| I    | rs6655269              | 153256435 |              | A             | 75.7%         | 68.9%          | <b>6.4E-07</b> | 1.39[1.22-1.59] | ND             |
| I    | rs5986947              | 153256505 |              | C             | 75.7%         | 68.9%          | <b>6.4E-07</b> | 1.39[1.22-1.59] | ND             |
| I    | rs12353692             | 153260032 |              | G             | 77.7%         | 71.4%          | <b>1.4E-06</b> | 1.39[1.22-1.59] | 0.25           |
| I    | rs5945384              | 153260414 |              | C             | 77.7%         | 71.4%          | <b>1.3E-06</b> | 1.39[1.22-1.59] | 0.25           |
| I    | rs11156610             | 153260745 |              | C             | 77.7%         | 71.4%          | <b>1.3E-06</b> | 1.39[1.22-1.59] | 0.25           |
| I    | X-153264541            | 153264541 |              | T             | 3.6%          | 3.0%           | 0.162          | 1.25[0.91-1.71] | --             |
| I    | rs11795678             | 153265728 |              | G             | 84.3%         | 76.7%          | <b>1.8E-10</b> | 1.62[1.39-1.87] | ND             |
| I    | rs5986948              | 153266172 |              | T             | 84.3%         | 76.7%          | <b>1.8E-10</b> | 1.62[1.39-1.87] | ND             |
| I    | rs5945386              | 153269755 |              | G             | 84.1%         | 76.8%          | <b>4.6E-10</b> | 1.60[1.38-1.85] | ND             |
| I    | X-153271528            | 153271528 |              | A             | 4.6%          | 3.9%           | 0.202          | 1.20[0.91-1.59] | --             |
| G    | rs4898375              | 153273226 |              | A             | 82.1%         | 75.2%          | <b>5.2E-09</b> | 1.52[1.32-1.75] | *              |
| G    | rs633                  | 153274228 |              | C             | 83.5%         | 76.6%          | <b>2.6E-09</b> | 1.55[1.34-1.79] | 0.34           |
| I    | rs12400188             | 153275075 |              | G             | 83.7%         | 76.6%          | <b>1.7E-09</b> | 1.56[1.35-1.80] | 0.30           |
| G    | rs3027898              | 153275890 |              | C             | 83.4%         | 76.4%          | <b>2.3E-09</b> | 1.55[1.34-1.79] | 0.28           |
| I    | rs731642               | 153277507 | <i>IRAK1</i> | A             | 83.6%         | 76.4%          | <b>8.7E-10</b> | 1.58[1.36-1.82] | ND             |
| G    | rs2239673 <sup>a</sup> | 153277889 | <i>IRAK1</i> | C             | 83.5%         | 76.4%          | <b>1.3E-09</b> | 1.57[1.35-1.81] | 0.35           |
| I    | rs763737 <sup>a</sup>  | 153278307 | <i>IRAK1</i> | G             | 83.7%         | 76.7%          | <b>1.5E-09</b> | 1.56[1.35-1.81] | 0.29           |
| I    | rs1059703              | 153278829 | <i>IRAK1</i> | G             | 82.6%         | 75.7%          | <b>4.3E-09</b> | 1.53[1.33-1.77] | ND             |
| I    | rs5945174 <sup>a</sup> | 153279858 | <i>IRAK1</i> | G             | 83.8%         | 76.7%          | <b>1.1E-09</b> | 1.57[1.36-1.82] | 0.29           |
| G    | rs7061789 <sup>a</sup> | 153280475 | <i>IRAK1</i> | G             | 83.9%         | 77.3%          | <b>1.0E-08</b> | 1.53[1.32-1.77] | 0.22           |
| G    | rs1059702              | 153284192 | <i>IRAK1</i> | A             | 82.1%         | 74.9%          | <b>8.2E-10</b> | 1.56[1.35-1.79] | *              |
| G    | rs1059701              | 153284483 | <i>IRAK1</i> | G             | 83.4%         | 76.4%          | <b>2.5E-09</b> | 1.55[1.34-1.79] | 0.24           |
| G    | rs2734647              | 153292180 | <i>MECP2</i> | T             | 81.3%         | 74.5%          | <b>7.9E-09</b> | 1.51[1.32-1.74] | *              |
| G    | rs3813458              | 153293415 | <i>MECP2</i> | C             | 4.8%          | 4.1%           | 0.171          | 1.21[0.92-1.59] | --             |
| G    | rs2075596 <sup>b</sup> | 153297392 | <i>MECP2</i> | A             | 81.6%         | 75.6%          | <b>3.0E-07</b> | 1.44[1.25-1.66] | *              |
| G    | rs2075597              | 153297636 | <i>MECP2</i> | C             | 7.6%          | 11.2%          | <b>2.9E-05</b> | 0.65[0.53-0.80] | 0.22           |
| I    | rs3027933 <sup>b</sup> | 153298874 | <i>MECP2</i> | G             | 81.8%         | 75.6%          | <b>1.8E-07</b> | 1.45[1.26-1.67] | ND             |
| I    | rs4898467              | 153299924 | <i>MECP2</i> | G             | 83.0%         | 76.7%          | <b>8.0E-08</b> | 1.48[1.28-1.71] | ND             |
| I    | rs5987194              | 153301467 | <i>MECP2</i> | C             | 81.6%         | 75.4%          | <b>2.4E-07</b> | 1.45[1.26-1.67] | ND             |
| I    | rs1734790              | 153301653 | <i>MECP2</i> | C             | 82.6%         | 76.4%          | <b>1.5E-07</b> | 1.47[1.27-1.70] | ND             |
| G    | rs3027935              | 153304468 | <i>MECP2</i> | T             | 1.0%          | 0.9%           | 0.807          | 1.07[0.61-1.90] | --             |
| I    | rs909131               | 153308227 | <i>MECP2</i> | G             | 82.9%         | 76.3%          | <b>3.6E-08</b> | 1.50[1.30-1.73] | ND             |
| G    | rs17435 <sup>b</sup>   | 153311980 | <i>MECP2</i> | T             | 82.4%         | 75.3%          | <b>2.7E-09</b> | 1.53[1.33-1.76] | ND             |
| G    | rs7050901              | 153314310 | <i>MECP2</i> | T             | 1.0%          | 1.0%           | 0.930          | 1.03[0.58-1.80] | --             |
| G    | rs1624766 <sup>b</sup> | 153317154 | <i>MECP2</i> | C             | 82.2%         | 76.5%          | <b>1.5E-06</b> | 1.42[1.23-1.64] | ND             |
| G    | rs7884370              | 153322881 | <i>MECP2</i> | G             | 1.0%          | 1.0%           | 0.923          | 1.03[0.59-1.80] | --             |
| G    | rs1734787 <sup>b</sup> | 153325446 | <i>MECP2</i> | C             | 82.3%         | 75.6%          | <b>1.6E-08</b> | 1.50[1.31-1.73] | ND             |
| I    | rs1616369              | 153326464 | <i>MECP2</i> | A             | 82.5%         | 76.1%          | <b>6.8E-08</b> | 1.48[1.28-1.71] | *              |
| G    | rs5987201              | 153330042 | <i>MECP2</i> | T             | 1.0%          | 1.0%           | 0.923          | 1.03[0.59-1.80] | --             |
| G    | rs34834543             | 153330719 | <i>MECP2</i> | T             | 1.0%          | 1.0%           | 0.923          | 1.03[0.59-1.80] | --             |
| I    | rs1734791 <sup>b</sup> | 153330920 | <i>MECP2</i> | T             | 82.4%         | 76.0%          | <b>5.7E-08</b> | 1.49[1.29-1.71] | ND             |
| I    | rs5986950              | 153331053 | <i>MECP2</i> | G             | 1.0%          | 1.0%           | 0.923          | 1.03[0.59-1.80] | --             |
| I    | rs1734789              | 153331463 | <i>MECP2</i> | G             | 83.5%         | 77.0%          | <b>3.3E-08</b> | 1.51[1.30-1.74] | ND             |

| Type | SNP                    | Position  | Gene  | Tested allele | Frequency     |                | P              | OR              | P <sub>c</sub> |
|------|------------------------|-----------|-------|---------------|---------------|----------------|----------------|-----------------|----------------|
|      |                        |           |       |               | SLE (n=1,262) | CTRL (n=1,256) |                |                 |                |
| I    | rs4011489              | 153332155 | MECP2 | C             | 1.0%          | 1.0%           | 0.923          | 1.03[0.59-1.80] | --             |
| I    | rs111398632            | 153334146 | MECP2 | A             | 1.0%          | 1.0%           | 0.923          | 1.03[0.59-1.80] | --             |
| I    | rs111881122            | 153334181 | MECP2 | T             | 1.0%          | 1.0%           | 0.923          | 1.03[0.59-1.80] | --             |
| I    | rs7052196              | 153334432 | MECP2 | T             | 1.0%          | 1.0%           | 0.923          | 1.03[0.59-1.80] | --             |
| I    | rs7877644              | 153338287 | MECP2 | A             | 1.0%          | 1.0%           | 0.923          | 1.03[0.59-1.80] | --             |
| I    | rs113881950            | 153340281 | MECP2 | A             | 1.0%          | 1.0%           | 0.923          | 1.03[0.59-1.80] | --             |
| I    | rs1734792 <sup>b</sup> | 153341060 | MECP2 | A             | 82.3%         | 75.7%          | <b>3.8E-08</b> | 1.50[1.30-1.73] | ND             |
| G    | rs11156611             | 153344174 | MECP2 | A             | 1.0%          | 1.0%           | 0.958          | 0.99[0.57-1.70] | --             |
| I    | rs113162152            | 153346888 | MECP2 | T             | 1.0%          | 1.0%           | 0.923          | 1.03[0.59-1.80] | --             |
| I    | rs5987204              | 153347588 | MECP2 | A             | 1.0%          | 1.0%           | 0.923          | 1.03[0.59-1.80] | --             |
| G    | rs2239464 <sup>b</sup> | 153348431 | MECP2 | A             | 83.2%         | 76.8%          | <b>5.3E-08</b> | 1.49[1.29-1.72] | ND             |
| G    | rs5987205              | 153348586 | MECP2 | G             | 1.0%          | 1.0%           | 0.922          | 1.03[0.59-1.81] | --             |
| G    | rs5986954              | 153349295 | MECP2 | G             | 1.0%          | 1.0%           | 0.923          | 1.03[0.59-1.80] | --             |
| I    | rs5945393              | 153349428 | MECP2 | G             | 83.4%         | 76.9%          | <b>2.3E-08</b> | 1.51[1.31-1.74] | ND             |
| I    | rs5986955              | 153349494 | MECP2 | G             | 1.0%          | 1.0%           | 0.923          | 1.03[0.59-1.80] | --             |
| I    | rs12390791             | 153355759 | MECP2 | A             | 1.0%          | 1.0%           | 0.923          | 1.03[0.59-1.80] | --             |
| G    | rs12390885             | 153356015 | MECP2 | A             | 1.0%          | 1.0%           | 0.926          | 1.03[0.59-1.80] | --             |
| G    | rs35609266             | 153358115 | MECP2 | T             | 1.0%          | 1.0%           | 0.934          | 1.02[0.58-1.80] | --             |
| I    | rs2872736              | 153376436 |       | C             | 83.3%         | 76.7%          | <b>3.0E-08</b> | 1.51[1.31-1.75] | ND             |

If *P* reached the Bonferroni-corrected significance level of  $2.9 \times 10^{-4}$ , it is highlighted in bold and italic.

Type of file: table

Label: S3

Filename: TableS3.doc



**Table S3. Allelic association of 136 Xq28 SNPs with SLE in Hispanics enriched for the Amerindian-European admixture**

| Type | SNP                    | Position  | Gene           | Tested allele | Frequency     |              | P              | OR              | P <sub>c</sub> |
|------|------------------------|-----------|----------------|---------------|---------------|--------------|----------------|-----------------|----------------|
|      |                        |           |                |               | SLE (n=1,487) | CTRL (n=807) |                |                 |                |
| I    | rs4646264              | 153140354 | <i>L1CAM</i>   | G             | 5.6%          | 4.7%         | 0.423          | 1.13[0.84-1.51] | --             |
| I    | rs7055451              | 153142315 | <i>L1CAM</i>   | C             | 5.6%          | 4.7%         | 0.423          | 1.13[0.84-1.51] | --             |
| I    | rs5945360              | 153146216 | <i>L1CAM</i>   | G             | 7.2%          | 6.4%         | 0.662          | 1.06[0.82-1.37] | --             |
| I    | rs5945362              | 153147267 | <i>L1CAM</i>   | T             | 6.2%          | 4.8%         | 0.163          | 1.23[0.92-1.64] | --             |
| G    | rs12156710             | 153150791 | <i>L1CAM</i>   | T             | 59.1%         | 52.0%        | 6.4E-03        | 1.19[1.05-1.35] | 0.61           |
| I    | rs5987175              | 153153839 |                | T             | 61.1%         | 54.9%        | 0.039          | 1.15[1.01-1.31] | 0.23           |
| I    | rs4898455              | 153154887 |                | G             | 7.2%          | 6.4%         | 0.671          | 1.06[0.82-1.36] | --             |
| I    | rs7060775              | 153157066 |                | C             | 7.5%          | 6.7%         | 0.813          | 1.03[0.81-1.32] | --             |
| G    | rs7065317              | 153157722 |                | A             | 7.6%          | 7.0%         | 0.902          | 1.02[0.80-1.29] | --             |
| G    | rs4898457              | 153158356 |                | A             | 61.3%         | 54.8%        | 0.022          | 1.16[1.02-1.32] | 0.46           |
| I    | rs5945169              | 153162037 |                | C             | 54.2%         | 48.5%        | 0.043          | 1.14[1.01-1.30] | 0.04           |
| I    | rs7052686              | 153162462 |                | T             | 61.6%         | 55.0%        | 0.026          | 1.16[1.02-1.32] | 0.42           |
| I    | rs7886319              | 153162986 |                | G             | 61.5%         | 54.7%        | 0.019          | 1.17[1.03-1.33] | 0.49           |
| I    | rs5987179              | 153163197 |                | G             | 61.5%         | 54.7%        | 0.020          | 1.17[1.03-1.33] | 0.50           |
| I    | rs5945367              | 153164342 |                | T             | 61.7%         | 55.0%        | 0.025          | 1.16[1.02-1.32] | 0.46           |
| G    | rs4898458              | 153167690 |                | G             | 61.6%         | 54.4%        | 5.0E-03        | 1.20[1.06-1.37] | 0.67           |
| I    | rs12559136             | 153168154 | <i>AVPR2</i>   | A             | 6.2%          | 4.8%         | 0.174          | 1.22[0.92-1.62] | --             |
| I    | rs3761528              | 153168449 | <i>AVPR2</i>   | C             | 63.1%         | 56.0%        | 7.4E-03        | 1.19[1.05-1.36] | 0.55           |
| G    | rs3761527              | 153168624 | <i>AVPR2</i>   | C             | 64.9%         | 58.3%        | 0.015          | 1.18[1.03-1.34] | 0.56           |
| G    | rs762655               | 153169480 | <i>AVPR2</i>   | C             | 65.2%         | 58.8%        | 0.021          | 1.17[1.02-1.33] | 0.48           |
| G    | rs5201                 | 153171993 | <i>AVPR2</i>   | G             | 65.3%         | 58.7%        | 0.017          | 1.17[1.03-1.34] | 0.52           |
| I    | rs5202                 | 153172059 | <i>AVPR2</i>   | T             | 6.3%          | 4.9%         | 0.187          | 1.21[0.91-1.61] | --             |
| G    | rs2070097              | 153176254 | <i>ARHGAP4</i> | G             | 68.1%         | 62.4%        | 0.044          | 1.15[1.00-1.31] | 0.02           |
| I    | X-153188515            | 153188515 | <i>ARHGAP4</i> | T             | 4.6%          | 3.2%         | 0.233          | 1.23[0.88-1.71] | --             |
| I    | rs2269368 <sup>c</sup> | 153189819 | <i>ARHGAP4</i> | T             | 52.3%         | 42.5%        | <b>3.4E-05</b> | 1.32[1.16-1.50] | 0.05           |
| I    | X-153191293            | 153191293 | <i>ARHGAP4</i> | T             | 2.8%          | 1.8%         | 0.164          | 1.36[0.88-2.11] | --             |
| I    | rs2269369              | 153192433 |                | A             | 13.2%         | 8.7%         | 1.9E-03        | 1.39[1.13-1.71] | 0.28           |
| I    | rs2071128              | 153195393 | <i>NAA10</i>   | A             | 49.3%         | 37.8%        | <b>8.7E-08</b> | 1.44[1.26-1.65] | 0.38           |
| I    | rs4243543              | 153195884 | <i>NAA10</i>   | A             | 5.3%          | 5.2%         | 0.508          | 0.91[0.69-1.20] | --             |
| G    | rs2071129              | 153195921 | <i>NAA10</i>   | G             | 52.5%         | 42.8%        | <b>1.9E-05</b> | 1.32[1.16-1.50] | 0.19           |
| I    | rs2071130              | 153196057 | <i>NAA10</i>   | C             | 52.6%         | 42.8%        | <b>1.9E-05</b> | 1.32[1.16-1.51] | 0.11           |
| I    | rs2071131              | 153196345 | <i>NAA10</i>   | A             | 49.3%         | 37.7%        | <b>5.5E-08</b> | 1.45[1.27-1.66] | 0.32           |
| G    | rs4898373              | 153198128 | <i>NAA10</i>   | C             | 4.6%          | 3.5%         | 0.384          | 1.15[0.84-1.60] | --             |
| G    | rs5945377              | 153201293 | <i>RENBP</i>   | C             | 53.3%         | 43.6%        | <b>3.2E-05</b> | 1.31[1.16-1.49] | 0.22           |
| I    | rs5945378              | 153201441 | <i>RENBP</i>   | G             | 53.5%         | 43.9%        | <b>2.9E-05</b> | 1.32[1.16-1.50] | 0.19           |
| G    | rs2156929              | 153205370 | <i>RENBP</i>   | A             | 6.3%          | 7.0%         | 0.105          | 0.81[0.64-1.04] | --             |
| I    | rs73640842             | 153206902 | <i>RENBP</i>   | A             | 5.5%          | 4.4%         | 0.496          | 1.11[0.83-1.48] | --             |
| G    | rs2269371              | 153207025 | <i>RENBP</i>   | C             | 5.7%          | 4.7%         | 0.695          | 1.06[0.80-1.41] | --             |
| I    | rs78377269             | 153207037 | <i>RENBP</i>   | T             | 0.7%          | 1.7%         | 5.0E-03        | 0.43[0.23-0.77] | 0.04           |
| G    | rs3027871              | 153212440 |                | A             | 13.5%         | 9.3%         | 4.1E-03        | 1.35[1.10-1.65] | 0.43           |
| I    | X-153217701            | 153217701 | <i>HCFC1</i>   | A             | 0.7%          | 1.7%         | 4.8E-03        | 0.42[0.23-0.77] | 0.04           |
| I    | rs12388844             | 153228607 | <i>HCFC1</i>   | T             | 3.6%          | 4.9%         | 0.023          | 0.69[0.50-0.95] | 0.29           |
| I    | rs12392452             | 153229913 | <i>HCFC1</i>   | G             | 3.6%          | 5.0%         | 0.018          | 0.68[0.50-0.94] | 0.25           |
| G    | rs5945380              | 153230941 | <i>HCFC1</i>   | T             | 1.2%          | 1.6%         | 0.147          | 0.68[0.40-1.15] | 0.27           |
| G    | rs4898374              | 153241386 | <i>TMEM187</i> | T             | 56.4%         | 43.9%        | <b>5.6E-09</b> | 1.48[1.30-1.69] | 0.03           |

| Type | SNP                    | Position  | Gene           | Tested allele | Frequency     |              | P              | OR              | P <sub>c</sub> |
|------|------------------------|-----------|----------------|---------------|---------------|--------------|----------------|-----------------|----------------|
|      |                        |           |                |               | SLE (n=1,487) | CTRL (n=807) |                |                 |                |
| I    | X-153245250            | 153245250 | <i>TMEM187</i> | T             | 3.0%          | 1.8%         | 0.069          | 1.50[0.97-2.33] | --             |
| G    | rs13397                | 153248248 | <i>TMEM187</i> | A             | 50.1%         | 38.0%        | <b>3.0E-09</b> | 1.48[1.30-1.69] | *              |
| G    | rs4898375              | 153273226 |                | A             | 52.3%         | 40.3%        | <b>1.2E-08</b> | 1.46[1.28-1.67] | *              |
| G    | rs633                  | 153274228 |                | C             | 56.8%         | 46.2%        | <b>1.3E-06</b> | 1.37[1.21-1.56] | 0.53           |
| I    | rs12400188             | 153275075 |                | G             | 56.9%         | 46.4%        | <b>2.3E-06</b> | 1.37[1.20-1.55] | 0.42           |
| G    | rs3027898              | 153275890 |                | C             | 56.5%         | 46.3%        | <b>5.5E-06</b> | 1.35[1.19-1.54] | 0.43           |
| I    | rs731642               | 153277507 | <i>IRAK1</i>   | A             | 55.5%         | 44.8%        | <b>1.9E-06</b> | 1.37[1.21-1.57] | 0.34           |
| G    | rs2239673 <sup>a</sup> | 153277889 | <i>IRAK1</i>   | C             | 56.4%         | 46.3%        | <b>7.3E-06</b> | 1.34[1.18-1.53] | 0.46           |
| I    | rs763737 <sup>a</sup>  | 153278307 | <i>IRAK1</i>   | G             | 56.9%         | 46.5%        | <b>2.5E-06</b> | 1.36[1.20-1.55] | 0.57           |
| I    | rs1059703              | 153278829 | <i>IRAK1</i>   | G             | 54.7%         | 43.5%        | <b>2.8E-07</b> | 1.41[1.24-1.60] | 0.73           |
| G    | rs3027906              | 153278971 | <i>IRAK1</i>   | A             | 0.9%          | 1.4%         | 0.069          | 0.58[0.33-1.04] | --             |
| I    | rs5945174 <sup>a</sup> | 153279858 | <i>IRAK1</i>   | G             | 56.9%         | 46.5%        | <b>3.4E-06</b> | 1.36[1.19-1.55] | 0.53           |
| G    | rs7061789 <sup>a</sup> | 153280475 | <i>IRAK1</i>   | G             | 56.8%         | 46.7%        | <b>6.8E-06</b> | 1.34[1.18-1.53] | 0.28           |
| G    | rs1059702              | 153284192 | <i>IRAK1</i>   | A             | 51.0%         | 38.7%        | <b>1.5E-09</b> | 1.49[1.31-1.70] | *              |
| G    | rs1059701              | 153284483 | <i>IRAK1</i>   | G             | 58.2%         | 49.0%        | <b>9.0E-05</b> | 1.30[1.14-1.48] | 0.09           |
| G    | rs3027915              | 153287962 | <i>MECP2</i>   | G             | 1.4%          | 2.4%         | 0.115          | 0.69[0.43-1.10] | --             |
| I    | rs2734643              | 153291187 | <i>MECP2</i>   | T             | 1.4%          | 2.3%         | 0.024          | 0.58[0.37-0.93] | 0.14           |
| G    | rs2734647              | 153292180 | <i>MECP2</i>   | T             | 51.3%         | 39.4%        | <b>1.7E-08</b> | 1.46[1.28-1.66] | *              |
| I    | rs3027925              | 153295191 | <i>MECP2</i>   | T             | 1.1%          | 1.7%         | 0.016          | 0.52[0.31-0.89] | ND             |
| G    | rs2075596 <sup>b</sup> | 153297392 | <i>MECP2</i>   | A             | 49.7%         | 37.4%        | <b>1.8E-09</b> | 1.50[1.31-1.71] | *              |
| G    | rs2075597              | 153297636 | <i>MECP2</i>   | C             | 5.1%          | 3.9%         | 0.248          | 1.20[0.88-1.64] | --             |
| I    | rs3027932              | 153298434 | <i>MECP2</i>   | G             | 4.9%          | 7.6%         | <b>7.9E-05</b> | 0.60[0.46-0.77] | 0.07           |
| I    | rs12557066             | 153299520 | <i>MECP2</i>   | G             | 1.1%          | 1.7%         | 0.016          | 0.52[0.31-0.88] | ND             |
| I    | rs4898467              | 153299924 | <i>MECP2</i>   | G             | 56.1%         | 46.5%        | <b>9.0E-05</b> | 1.30[1.14-1.48] | 0.03           |
| I    | X-153299971            | 153299971 | <i>MECP2</i>   | T             | 3.5%          | 5.1%         | 2.0E-03        | 0.62[0.46-0.84] | 0.28           |
| I    | X-153300033            | 153300033 | <i>MECP2</i>   | A             | 3.5%          | 5.1%         | 2.0E-03        | 0.62[0.46-0.84] | 0.28           |
| I    | rs1734790              | 153301653 | <i>MECP2</i>   | C             | 56.1%         | 46.5%        | <b>9.0E-05</b> | 1.30[1.14-1.48] | 0.02           |
| I    | rs5987195              | 153301742 | <i>MECP2</i>   | G             | 3.5%          | 5.1%         | 2.0E-03        | 0.62[0.46-0.84] | 0.28           |
| I    | rs5987196              | 153301935 | <i>MECP2</i>   | A             | 3.5%          | 5.1%         | 2.0E-03        | 0.62[0.46-0.84] | 0.28           |
| I    | X-153302636            | 153302636 | <i>MECP2</i>   | C             | 4.8%          | 6.7%         | 2.6E-03        | 0.66[0.51-0.87] | 0.37           |
| G    | rs3027935              | 153304468 | <i>MECP2</i>   | T             | 5.2%          | 7.5%         | 8.8E-04        | 0.65[0.51-0.84] | 0.27           |
| I    | rs7887323              | 153305048 | <i>MECP2</i>   | C             | 4.1%          | 5.5%         | 0.015          | 0.70[0.52-0.93] | 0.83           |
| I    | X-153306558            | 153306558 | <i>MECP2</i>   | G             | 1.1%          | 1.6%         | 0.024          | 0.54[0.32-0.92] | ND             |
| I    | rs3027937              | 153306660 | <i>MECP2</i>   | A             | 1.4%          | 2.2%         | 0.038          | 0.61[0.38-0.97] | 0.13           |
| I    | rs909131               | 153308227 | <i>MECP2</i>   | G             | 56.6%         | 46.8%        | <b>3.8E-05</b> | 1.32[1.16-1.50] | 0.14           |
| I    | rs3027939              | 153310578 | <i>MECP2</i>   | G             | 4.2%          | 5.6%         | 0.010          | 0.69[0.52-0.92] | 0.68           |
| I    | rs5987198              | 153311352 | <i>MECP2</i>   | A             | 4.2%          | 5.6%         | 0.010          | 0.69[0.52-0.92] | 0.68           |
| G    | rs17435 <sup>b</sup>   | 153311980 | <i>MECP2</i>   | T             | 56.5%         | 47.5%        | <b>1.8E-04</b> | 1.28[1.13-1.46] | 0.02           |
| G    | rs7050901              | 153314310 | <i>MECP2</i>   | T             | 2.4%          | 3.1%         | 0.168          | 0.77[0.53-1.12] | --             |
| G    | rs7059306              | 153314990 | <i>MECP2</i>   | A             | 1.4%          | 2.3%         | 0.034          | 0.61[0.38-0.96] | 0.12           |
| I    | rs3027944              | 153316062 | <i>MECP2</i>   | G             | 4.2%          | 5.7%         | 8.3E-03        | 0.68[0.52-0.91] | 0.62           |
| G    | rs1624766 <sup>b</sup> | 153317154 | <i>MECP2</i>   | C             | 55.6%         | 45.6%        | <b>9.9E-06</b> | 1.35[1.18-1.54] | 0.34           |
| I    | X-153317715            | 153317715 | <i>MECP2</i>   | T             | 98.9%         | 98.3%        | 0.016          | 1.92[1.13-3.26] | ND             |
| I    | rs5987199              | 153319087 | <i>MECP2</i>   | G             | 4.2%          | 5.7%         | 9.9E-03        | 0.69[0.52-0.91] | 0.67           |
| I    | rs5987200              | 153319119 | <i>MECP2</i>   | C             | 4.2%          | 5.7%         | 9.9E-03        | 0.69[0.52-0.91] | 0.67           |
| I    | rs112643842            | 153319757 | <i>MECP2</i>   | T             | 4.2%          | 5.7%         | 9.9E-03        | 0.69[0.52-0.91] | 0.67           |

| Type | SNP                    | Position  | Gene  | Tested allele | Frequency     |              | P              | OR              | P <sub>c</sub> |
|------|------------------------|-----------|-------|---------------|---------------|--------------|----------------|-----------------|----------------|
|      |                        |           |       |               | SLE (n=1,487) | CTRL (n=807) |                |                 |                |
| I    | rs112812100            | 153319857 | MECP2 | C             | 4.2%          | 5.7%         | 9.8E-03        | 0.69[0.52-0.91] | 0.66           |
| I    | rs12559567             | 153321043 | MECP2 | A             | 4.2%          | 5.7%         | 9.8E-03        | 0.69[0.52-0.91] | 0.66           |
| G    | rs7884370              | 153322881 | MECP2 | G             | 4.4%          | 6.0%         | 7.8E-03        | 0.69[0.52-0.91] | 0.71           |
| G    | rs1734787 <sup>b</sup> | 153325446 | MECP2 | C             | 50.2%         | 38.1%        | <b>4.0E-09</b> | 1.48[1.30-1.69] | ND             |
| I    | rs1616369              | 153326464 | MECP2 | A             | 50.1%         | 37.8%        | <b>2.9E-09</b> | 1.49[1.30-1.69] | *              |
| G    | rs5987201              | 153330042 | MECP2 | T             | 4.2%          | 5.7%         | 0.010          | 0.69[0.52-0.92] | 0.68           |
| G    | rs34834543             | 153330719 | MECP2 | T             | 4.2%          | 5.7%         | 1.0E-02        | 0.69[0.52-0.92] | 0.68           |
| I    | rs1734791 <sup>b</sup> | 153330920 | MECP2 | T             | 51.6%         | 40.1%        | <b>7.8E-08</b> | 1.43[1.26-1.63] | 0.14           |
| I    | rs5986950              | 153331053 | MECP2 | G             | 4.1%          | 5.6%         | 0.012          | 0.69[0.52-0.92] | 0.68           |
| I    | rs1734789              | 153331463 | MECP2 | G             | 56.4%         | 47.0%        | <b>7.6E-05</b> | 1.30[1.14-1.48] | 0.08           |
| I    | rs4011489              | 153332155 | MECP2 | C             | 4.1%          | 5.6%         | 0.010          | 0.69[0.52-0.91] | 0.68           |
| I    | rs111398632            | 153334146 | MECP2 | A             | 3.6%          | 5.3%         | 1.6E-03        | 0.62[0.46-0.83] | 0.28           |
| I    | rs111881122            | 153334181 | MECP2 | T             | 3.6%          | 5.3%         | 1.6E-03        | 0.62[0.46-0.83] | 0.28           |
| I    | rs7052196              | 153334432 | MECP2 | T             | 3.6%          | 5.3%         | 1.6E-03        | 0.62[0.46-0.83] | 0.28           |
| I    | rs7877644              | 153338287 | MECP2 | A             | 3.6%          | 5.4%         | 1.5E-03        | 0.62[0.46-0.83] | 0.24           |
| I    | rs113881950            | 153340281 | MECP2 | A             | 3.6%          | 5.4%         | 1.4E-03        | 0.62[0.46-0.83] | 0.24           |
| I    | rs1734792 <sup>b</sup> | 153341060 | MECP2 | A             | 51.6%         | 40.1%        | <b>4.4E-08</b> | 1.44[1.26-1.64] | 0.14           |
| I    | rs4898376              | 153343006 | MECP2 | T             | 43.3%         | 52.5%        | <b>1.0E-04</b> | 0.77[0.68-0.88] | 0.08           |
| G    | rs11156611             | 153344174 | MECP2 | A             | 4.3%          | 5.8%         | 9.2E-03        | 0.69[0.52-0.91] | 0.71           |
| I    | rs113162152            | 153346888 | MECP2 | T             | 3.6%          | 5.6%         | 4.5E-04        | 0.59[0.44-0.79] | 0.17           |
| I    | rs5987204              | 153347588 | MECP2 | A             | 3.6%          | 5.5%         | 6.0E-04        | 0.60[0.44-0.80] | 0.19           |
| G    | rs2239464 <sup>b</sup> | 153348431 | MECP2 | A             | 55.7%         | 46.5%        | <b>1.2E-04</b> | 1.29[1.13-1.46] | 0.03           |
| G    | rs5987205              | 153348586 | MECP2 | G             | 3.8%          | 5.7%         | 1.3E-03        | 0.62[0.47-0.83] | 0.29           |
| G    | rs5986954              | 153349295 | MECP2 | G             | 3.6%          | 4.9%         | 9.3E-03        | 0.67[0.49-0.90] | 0.36           |
| I    | rs5945393              | 153349428 | MECP2 | G             | 55.3%         | 45.8%        | <b>5.1E-05</b> | 1.31[1.15-1.49] | 0.08           |
| I    | rs5986955              | 153349494 | MECP2 | G             | 3.6%          | 5.6%         | 6.8E-04        | 0.60[0.45-0.81] | 0.21           |
| I    | rs12390791             | 153355759 | MECP2 | A             | 3.6%          | 5.6%         | 6.8E-04        | 0.60[0.45-0.81] | 0.21           |
| G    | rs12390885             | 153356015 | MECP2 | A             | 3.8%          | 5.6%         | 1.7E-03        | 0.63[0.47-0.84] | 0.30           |
| G    | rs35609266             | 153358115 | MECP2 | T             | 3.9%          | 5.6%         | 2.0E-03        | 0.63[0.48-0.85] | 0.43           |
| I    | rs28458447             | 153359700 | MECP2 | C             | 4.1%          | 5.8%         | 3.9E-03        | 0.66[0.50-0.88] | 0.55           |
| I    | rs33976460             | 153360669 | MECP2 | A             | 3.6%          | 5.6%         | 6.7E-04        | 0.60[0.45-0.81] | 0.24           |
| I    | rs5987206              | 153366814 |       | C             | 51.7%         | 40.1%        | <b>4.0E-08</b> | 1.44[1.27-1.64] | 0.14           |
| I    | rs28781958             | 153366846 |       | T             | 4.1%          | 5.8%         | 3.9E-03        | 0.66[0.50-0.88] | 0.55           |
| I    | rs28876812             | 153366850 |       | T             | 4.1%          | 5.8%         | 3.9E-03        | 0.66[0.50-0.88] | 0.55           |
| I    | rs5987207              | 153366927 |       | C             | 4.1%          | 5.8%         | 3.9E-03        | 0.66[0.50-0.88] | 0.55           |
| I    | rs5986956              | 153367689 |       | A             | 3.6%          | 5.6%         | 6.7E-04        | 0.60[0.45-0.81] | 0.24           |
| I    | rs111354059            | 153368909 |       | G             | 4.1%          | 5.8%         | 3.9E-03        | 0.66[0.50-0.88] | 0.55           |
| I    | rs112724831            | 153368930 |       | G             | 4.1%          | 5.8%         | 3.9E-03        | 0.66[0.50-0.88] | 0.55           |
| I    | rs5987208              | 153369611 |       | A             | 3.6%          | 5.6%         | 6.7E-04        | 0.60[0.45-0.81] | 0.24           |
| I    | rs5986957              | 153372505 |       | T             | 50.2%         | 37.6%        | <b>9.9E-10</b> | 1.51[1.32-1.72] | ND             |
| I    | rs7058768              | 153372519 |       | G             | 3.6%          | 5.6%         | 6.7E-04        | 0.60[0.45-0.81] | 0.24           |
| I    | X-153372840            | 153372840 |       | T             | 3.6%          | 5.6%         | 6.7E-04        | 0.60[0.45-0.81] | 0.24           |
| I    | rs73629109             | 153373272 |       | G             | 3.7%          | 5.7%         | 5.2E-04        | 0.60[0.45-0.80] | 0.23           |
| I    | rs5987211              | 153376055 |       | T             | 4.1%          | 5.8%         | 3.9E-03        | 0.66[0.50-0.88] | 0.55           |
| I    | rs2872736              | 153376436 |       | C             | 56.1%         | 46.6%        | <b>5.3E-05</b> | 1.31[1.15-1.48] | 0.09           |

If *P* reached the Bonferroni-corrected significance level of  $2.9 \times 10^{-4}$ , it is highlighted in bold and italic.

Type of file: table

Label: S4

Filename: TableS4.doc

**Table S4. Allelic association of 157 Xq28 SNPs with SLE in subjects with African ancestry**

| Type | SNP         | Position  | Gene           | Tested allele | Frequency     |                | P            | OR              | P <sub>c</sub> |
|------|-------------|-----------|----------------|---------------|---------------|----------------|--------------|-----------------|----------------|
|      |             |           |                |               | SLE (n=1,674) | CTRL (n=1,920) |              |                 |                |
| I    | X-153148723 | 153148723 | <i>L1CAM</i>   | A             | 3.2%          | 3.2%           | 0.865        | 1.03[0.77-1.36] | --             |
| I    | rs6655267   | 153149809 | <i>L1CAM</i>   | G             | 30.8%         | 30.3%          | 0.581        | 1.03[0.92-1.15] | --             |
| G    | rs12156710  | 153150791 | <i>L1CAM</i>   | T             | 56.5%         | 56.7%          | 0.631        | 0.98[0.88-1.08] | --             |
| I    | rs41311376  | 153150929 | <i>L1CAM</i>   | A             | 56.7%         | 56.8%          | 0.704        | 0.98[0.89-1.09] | --             |
| I    | rs5987175   | 153153839 |                | T             | 88.2%         | 87.9%          | 0.876        | 1.01[0.87-1.18] | --             |
| I    | rs7060775   | 153157066 |                | C             | 20.6%         | 20.3%          | 0.841        | 1.01[0.89-1.15] | --             |
| G    | rs7065317   | 153157722 |                | A             | 21.1%         | 20.9%          | 0.910        | 1.01[0.89-1.14] | --             |
| G    | rs4898457   | 153158356 |                | A             | 86.1%         | 86.4%          | 0.632        | 0.97[0.83-1.12] | --             |
| I    | rs7052686   | 153162462 |                | T             | 88.3%         | 87.9%          | 0.705        | 1.03[0.88-1.21] | --             |
| G    | rs4898458   | 153167690 |                | G             | 75.6%         | 75.0%          | 0.866        | 1.01[0.90-1.14] | --             |
| I    | X-153168207 | 153168207 | <i>AVPR2</i>   | G             | 95.0%         | 96.1%          | <b>0.037</b> | 0.77[0.60-0.98] | 0.02           |
| I    | rs3761528   | 153168449 | <i>AVPR2</i>   | C             | 87.8%         | 87.5%          | 0.918        | 1.01[0.86-1.18] | --             |
| G    | rs3761527   | 153168624 | <i>AVPR2</i>   | C             | 80.8%         | 81.1%          | 0.652        | 0.97[0.85-1.10] | --             |
| G    | rs762655    | 153169480 | <i>AVPR2</i>   | C             | 81.0%         | 81.4%          | 0.589        | 0.97[0.85-1.10] | --             |
| G    | rs5201      | 153171993 | <i>AVPR2</i>   | G             | 86.8%         | 86.9%          | 0.617        | 0.96[0.83-1.12] | --             |
| G    | rs2070097   | 153176254 | <i>ARHGAP4</i> | G             | 86.4%         | 86.9%          | 0.539        | 0.96[0.83-1.11] | --             |
| G    | rs2071129   | 153195921 | <i>NAA10</i>   | G             | 48.0%         | 47.5%          | 0.818        | 1.01[0.92-1.12] | --             |
| I    | rs2071130   | 153196057 | <i>NAA10</i>   | C             | 48.6%         | 48.1%          | 0.773        | 1.02[0.92-1.12] | --             |
| I    | X-153196182 | 153196182 | <i>NAA10</i>   | T             | 10.7%         | 10.4%          | 0.827        | 1.02[0.86-1.20] | --             |
| G    | rs4898373   | 153198128 | <i>NAA10</i>   | C             | 2.9%          | 2.4%           | 0.431        | 1.13[0.83-1.55] | --             |
| I    | X-153200016 | 153200016 | <i>NAA10</i>   | T             | 11.9%         | 11.6%          | 0.827        | 1.02[0.87-1.19] | --             |
| G    | rs5945377   | 153201293 | <i>RENBP</i>   | C             | 60.0%         | 60.6%          | 0.465        | 0.96[0.87-1.07] | --             |
| G    | rs2156929   | 153205370 | <i>RENBP</i>   | A             | 9.2%          | 9.8%           | 0.584        | 0.95[0.80-1.13] | --             |
| I    | rs73640842  | 153206902 | <i>RENBP</i>   | A             | 14.4%         | 14.1%          | 0.875        | 1.01[0.88-1.17] | --             |
| G    | rs2269371   | 153207025 | <i>RENBP</i>   | C             | 14.6%         | 14.3%          | 0.890        | 1.01[0.88-1.17] | --             |
| I    | rs78377269  | 153207037 | <i>RENBP</i>   | T             | 4.5%          | 4.5%           | 0.749        | 1.04[0.81-1.33] | --             |
| I    | rs3027869   | 153211538 |                | A             | 12.8%         | 11.3%          | 0.058        | 1.16[1.00-1.36] | 0.93           |
| I    | rs7882027   | 153211607 |                | T             | 10.8%         | 10.7%          | 0.938        | 0.99[0.84-1.17] | --             |
| I    | rs762656    | 153211652 |                | G             | 70.2%         | 71.3%          | 0.292        | 0.94[0.84-1.05] | --             |
| I    | rs7889328   | 153211887 |                | A             | 10.8%         | 10.7%          | 0.938        | 0.99[0.84-1.17] | --             |
| I    | rs7889967   | 153212344 |                | A             | 10.8%         | 10.7%          | 0.929        | 0.99[0.84-1.17] | --             |
| I    | X-153215345 | 153215345 | <i>HCFC1</i>   | A             | 10.9%         | 10.7%          | 0.925        | 0.99[0.84-1.17] | --             |
| I    | rs2071132   | 153216036 | <i>HCFC1</i>   | A             | 70.6%         | 71.5%          | 0.423        | 0.96[0.85-1.07] | --             |
| I    | rs1051153   | 153218362 | <i>HCFC1</i>   | T             | 10.8%         | 10.7%          | 0.904        | 0.99[0.84-1.17] | --             |
| I    | rs1051152   | 153220360 | <i>HCFC1</i>   | G             | 70.2%         | 71.0%          | 0.491        | 0.96[0.86-1.07] | --             |
| I    | rs730106    | 153221657 | <i>HCFC1</i>   | C             | 70.2%         | 71.0%          | 0.491        | 0.96[0.86-1.07] | --             |
| I    | rs1051151   | 153222483 | <i>HCFC1</i>   | T             | 10.8%         | 10.7%          | 0.924        | 0.99[0.84-1.17] | --             |
| I    | X-153224956 | 153224956 | <i>HCFC1</i>   | A             | 1.4%          | 1.7%           | 0.371        | 0.83[0.54-1.25] | --             |
| G    | rs632       | 153226471 | <i>HCFC1</i>   | C             | 70.1%         | 70.6%          | 0.649        | 0.97[0.87-1.09] | --             |
| I    | rs17422     | 153227426 | <i>HCFC1</i>   | G             | 70.2%         | 70.8%          | 0.567        | 0.97[0.87-1.08] | --             |
| I    | rs2266886   | 153231352 | <i>HCFC1</i>   | C             | 70.2%         | 70.8%          | 0.564        | 0.97[0.87-1.08] | --             |
| I    | rs80208125  | 153238220 | <i>TMEM187</i> | G             | 70.4%         | 70.9%          | 0.631        | 0.97[0.87-1.09] | --             |
| I    | X-153239504 | 153239504 | <i>TMEM187</i> | T             | 3.9%          | 4.1%           | 0.681        | 0.95[0.73-1.23] | --             |
| I    | rs2266887   | 153239587 | <i>TMEM187</i> | T             | 70.4%         | 71.1%          | 0.595        | 0.97[0.87-1.08] | --             |
| I    | rs2266888   | 153239720 | <i>TMEM187</i> | A             | 18.1%         | 16.8%          | 0.098        | 1.12[0.98-1.28] | --             |

| Type | SNP                    | Position  | Gene           | Tested allele | Frequency     |                | P              | OR              | P <sub>c</sub> |
|------|------------------------|-----------|----------------|---------------|---------------|----------------|----------------|-----------------|----------------|
|      |                        |           |                |               | SLE (n=1,674) | CTRL (n=1,920) |                |                 |                |
| G    | rs4898374              | 153241386 | <i>TMEM187</i> | T             | 18.1%         | 17.0%          | 0.184          | 1.09[0.96-1.25] | --             |
| I    | X-153243038            | 153243038 | <i>TMEM187</i> | A             | 10.7%         | 10.6%          | 0.934          | 0.99[0.84-1.17] | --             |
| I    | X-153243238            | 153243238 | <i>TMEM187</i> | T             | 8.6%          | 8.6%           | 0.932          | 0.99[0.83-1.19] | --             |
| I    | rs12384878             | 153245128 | <i>TMEM187</i> | G             | 18.0%         | 16.5%          | 0.066          | 1.13[0.99-1.29] | --             |
| I    | rs6643653              | 153246018 | <i>TMEM187</i> | G             | 13.2%         | 11.2%          | <b>9.2E-03</b> | 1.23[1.05-1.43] | 0.49           |
| I    | X-153246410            | 153246410 | <i>TMEM187</i> | A             | 10.3%         | 9.9%           | 0.771          | 1.03[0.87-1.21] | --             |
| I    | rs2266890              | 153247722 | <i>TMEM187</i> | T             | 12.9%         | 10.9%          | <b>0.012</b>   | 1.22[1.05-1.43] | 0.42           |
| I    | rs6571303              | 153247954 | <i>TMEM187</i> | T             | 12.7%         | 10.9%          | <b>0.015</b>   | 1.22[1.04-1.42] | 0.46           |
| G    | rs13397                | 153248248 | <i>TMEM187</i> | A             | 5.7%          | 4.1%           | <b>4.2E-03</b> | 1.41[1.12-1.79] | *              |
| I    | rs5945173              | 153250172 |                | A             | 12.7%         | 10.9%          | <b>0.019</b>   | 1.21[1.03-1.41] | 0.47           |
| I    | X-153254913            | 153254913 |                | A             | 1.3%          | 1.7%           | 0.357          | 0.82[0.54-1.25] | --             |
| I    | X-153265639            | 153265639 |                | G             | 3.0%          | 2.8%           | 0.646          | 1.07[0.80-1.45] | --             |
| I    | X-153267758            | 153267758 |                | A             | 11.7%         | 11.6%          | 0.920          | 1.01[0.86-1.18] | --             |
| I    | rs58685547             | 153269286 |                | G             | 6.0%          | 6.5%           | 0.433          | 0.92[0.74-1.14] | --             |
| I    | X-153271114            | 153271114 |                | A             | 3.1%          | 2.9%           | 0.668          | 1.07[0.79-1.43] | --             |
| I    | X-153272635            | 153272635 |                | A             | 13.6%         | 13.5%          | 0.908          | 1.01[0.87-1.17] | --             |
| G    | rs4898375              | 153273226 |                | A             | 6.1%          | 4.3%           | <b>1.7E-03</b> | 1.44[1.15-1.82] | *              |
| G    | rs633                  | 153274228 |                | C             | 42.4%         | 42.2%          | 0.950          | 1.00[0.91-1.11] | --             |
| I    | rs12400188             | 153275075 |                | G             | 42.3%         | 42.1%          | 0.998          | 1.00[0.90-1.11] | --             |
| G    | rs3027898              | 153275890 |                | C             | 43.5%         | 43.5%          | 0.948          | 1.00[0.90-1.10] | --             |
| I    | rs3027899              | 153276357 | <i>IRAK1</i>   | T             | 2.6%          | 2.4%           | 0.504          | 1.11[0.81-1.53] | --             |
| I    | rs3027900              | 153277168 | <i>IRAK1</i>   | T             | 2.0%          | 2.3%           | 0.487          | 0.89[0.63-1.25] | --             |
| I    | rs3027902              | 153277471 | <i>IRAK1</i>   | T             | 14.7%         | 14.1%          | 0.500          | 1.05[0.91-1.21] | --             |
| I    | rs3027903              | 153277750 | <i>IRAK1</i>   | A             | 4.7%          | 4.8%           | 0.985          | 1.00[0.79-1.27] | --             |
| G    | rs2239673 <sup>a</sup> | 153277889 | <i>IRAK1</i>   | C             | 43.4%         | 43.2%          | 0.976          | 1.00[0.90-1.10] | --             |
| I    | rs763737 <sup>a</sup>  | 153278307 | <i>IRAK1</i>   | G             | 43.6%         | 43.5%          | 0.999          | 1.00[0.90-1.11] | --             |
| I    | X-153278421            | 153278421 | <i>IRAK1</i>   | T             | 2.0%          | 2.3%           | 0.487          | 0.89[0.63-1.25] | --             |
| G    | rs3027906              | 153278971 | <i>IRAK1</i>   | A             | 14.6%         | 14.3%          | 0.770          | 1.02[0.89-1.18] | --             |
| I    | rs5945174 <sup>a</sup> | 153279858 | <i>IRAK1</i>   | G             | 43.9%         | 43.8%          | 0.945          | 1.00[0.91-1.11] | --             |
| G    | rs7061789 <sup>a</sup> | 153280475 | <i>IRAK1</i>   | G             | 44.4%         | 44.9%          | 0.650          | 0.98[0.88-1.08] | --             |
| I    | X-153280591            | 153280591 | <i>IRAK1</i>   | A             | 1.1%          | 1.2%           | 0.622          | 0.89[0.56-1.42] | --             |
| G    | rs10127175             | 153284172 | <i>IRAK1</i>   | T             | 5.5%          | 5.9%           | 0.425          | 0.92[0.74-1.14] | --             |
| G    | rs1059702              | 153284192 | <i>IRAK1</i>   | A             | 5.9%          | 4.1%           | <b>1.0E-03</b> | 1.48[1.17-1.87] | *              |
| G    | rs11465830             | 153284198 | <i>IRAK1</i>   | T             | 4.7%          | 4.6%           | 0.950          | 0.99[0.78-1.26] | --             |
| G    | rs1059701              | 153284483 | <i>IRAK1</i>   | G             | 72.0%         | 72.0%          | 0.879          | 0.99[0.89-1.11] | --             |
| I    | rs7877076              | 153285629 |                | T             | 1.1%          | 1.2%           | 0.648          | 0.90[0.56-1.43] | --             |
| I    | X-153285683            | 153285683 |                | A             | 3.1%          | 3.0%           | 0.812          | 1.04[0.77-1.39] | --             |
| I    | X-153286083            | 153286083 |                | G             | 94.1%         | 93.9%          | 0.603          | 1.06[0.86-1.31] | --             |
| G    | rs2734647              | 153292180 | <i>MECP2</i>   | T             | 6.5%          | 4.7%           | <b>1.7E-03</b> | 1.42[1.14-1.78] | *              |
| I    | rs3027921              | 153293161 | <i>MECP2</i>   | T             | 1.3%          | 1.4%           | 0.986          | 1.00[0.65-1.55] | --             |
| I    | rs2734645              | 153294376 | <i>MECP2</i>   | T             | 13.2%         | 12.2%          | 0.271          | 1.09[0.94-1.27] | --             |
| I    | X-153295310            | 153295310 | <i>MECP2</i>   | G             | 3.1%          | 3.0%           | 0.748          | 1.05[0.78-1.41] | --             |
| G    | rs2075596 <sup>b</sup> | 153297392 | <i>MECP2</i>   | A             | 6.8%          | 4.9%           | <b>9.8E-04</b> | 1.45[1.16-1.80] | *              |
| I    | X-153300033            | 153300033 | <i>MECP2</i>   | A             | 16.6%         | 17.5%          | 0.247          | 0.92[0.81-1.06] | --             |
| I    | rs5987195              | 153301742 | <i>MECP2</i>   | G             | 16.7%         | 17.5%          | 0.243          | 0.92[0.81-1.06] | --             |
| I    | rs5987196              | 153301935 | <i>MECP2</i>   | A             | 16.7%         | 17.5%          | 0.243          | 0.92[0.81-1.06] | --             |
| G    | rs3027935              | 153304468 | <i>MECP2</i>   | T             | 20.7%         | 21.9%          | 0.141          | 0.91[0.81-1.03] | --             |

| Type | SNP                    | Position  | Gene  | Tested allele | Frequency     |                | P              | OR              | P <sub>c</sub> |
|------|------------------------|-----------|-------|---------------|---------------|----------------|----------------|-----------------|----------------|
|      |                        |           |       |               | SLE (n=1,674) | CTRL (n=1,920) |                |                 |                |
| I    | rs7887323              | 153305048 | MECP2 | C             | 22.1%         | 23.7%          | 0.096          | 0.90[0.80-1.02] | --             |
| I    | rs3027936              | 153305844 | MECP2 | T             | 13.5%         | 12.7%          | 0.423          | 1.06[0.91-1.24] | --             |
| I    | rs3027937              | 153306660 | MECP2 | A             | 17.0%         | 17.4%          | 0.731          | 0.98[0.85-1.12] | --             |
| G    | rs3027938              | 153307687 | MECP2 | G             | 6.8%          | 7.7%           | 0.144          | 0.87[0.71-1.05] | --             |
| I    | rs909131               | 153308227 | MECP2 | G             | 59.3%         | 59.5%          | 0.775          | 0.98[0.89-1.09] | --             |
| I    | X-153309238            | 153309238 | MECP2 | T             | 3.4%          | 3.3%           | 0.779          | 1.04[0.78-1.38] | --             |
| I    | rs3027939              | 153310578 | MECP2 | G             | 21.6%         | 23.4%          | 0.062          | 0.89[0.79-1.01] | --             |
| I    | rs5987198              | 153311352 | MECP2 | A             | 21.6%         | 23.3%          | 0.065          | 0.89[0.79-1.01] | --             |
| G    | rs17435 <sup>b</sup>   | 153311980 | MECP2 | T             | 61.4%         | 61.8%          | 0.522          | 0.97[0.87-1.07] | --             |
| G    | rs7050901              | 153314310 | MECP2 | T             | 12.7%         | 14.0%          | 0.108          | 0.89[0.76-1.03] | --             |
| G    | rs7059306              | 153314990 | MECP2 | A             | 17.5%         | 17.8%          | 0.763          | 0.98[0.86-1.12] | --             |
| I    | rs3027944              | 153316062 | MECP2 | G             | 21.7%         | 23.4%          | 0.063          | 0.89[0.79-1.01] | --             |
| I    | rs5987199              | 153319087 | MECP2 | G             | 21.7%         | 23.5%          | 0.063          | 0.89[0.79-1.01] | --             |
| I    | rs5987200              | 153319119 | MECP2 | C             | 21.7%         | 23.5%          | 0.063          | 0.89[0.79-1.01] | --             |
| I    | rs112643842            | 153319757 | MECP2 | T             | 18.5%         | 20.3%          | <b>0.050</b>   | 0.88[0.77-1.00] | 0.11           |
| I    | rs112812100            | 153319857 | MECP2 | C             | 21.7%         | 23.4%          | 0.066          | 0.89[0.79-1.01] | --             |
| G    | rs7884370              | 153322881 | MECP2 | G             | 21.8%         | 23.5%          | 0.076          | 0.90[0.80-1.01] | --             |
| G    | rs1734787 <sup>b</sup> | 153325446 | MECP2 | C             | 10.5%         | 8.9%           | <b>0.021</b>   | 1.22[1.03-1.45] | 0.91           |
| I    | rs1616369              | 153326464 | MECP2 | A             | 6.7%          | 4.7%           | <b>4.0E-04</b> | 1.50[1.20-1.88] | *              |
| I    | X-153326736            | 153326736 | MECP2 | C             | 13.6%         | 12.9%          | 0.449          | 1.06[0.91-1.23] | --             |
| G    | rs5987201              | 153330042 | MECP2 | T             | 20.5%         | 22.0%          | 0.078          | 0.90[0.79-1.01] | --             |
| G    | rs34834543             | 153330719 | MECP2 | T             | 20.5%         | 22.1%          | 0.074          | 0.90[0.79-1.01] | --             |
| I    | rs1734791 <sup>b</sup> | 153330920 | MECP2 | T             | 28.2%         | 27.0%          | 0.210          | 1.08[0.96-1.21] | --             |
| I    | rs5986950              | 153331053 | MECP2 | G             | 18.2%         | 19.6%          | 0.082          | 0.89[0.79-1.01] | --             |
| I    | rs1734789              | 153331463 | MECP2 | G             | 62.8%         | 63.3%          | 0.492          | 0.96[0.87-1.07] | --             |
| I    | rs4011489              | 153332155 | MECP2 | C             | 18.2%         | 19.5%          | 0.086          | 0.89[0.79-1.02] | --             |
| I    | X-153333544            | 153333544 | MECP2 | A             | 2.9%          | 3.9%           | <b>0.026</b>   | 0.73[0.55-0.96] | 0.04           |
| I    | X-153333964            | 153333964 | MECP2 | C             | 13.6%         | 12.9%          | 0.446          | 1.06[0.91-1.23] | --             |
| I    | rs111398632            | 153334146 | MECP2 | A             | 18.1%         | 19.5%          | 0.082          | 0.89[0.79-1.01] | --             |
| I    | rs111881122            | 153334181 | MECP2 | T             | 18.1%         | 19.5%          | 0.082          | 0.89[0.79-1.01] | --             |
| I    | rs7052196              | 153334432 | MECP2 | T             | 18.1%         | 19.5%          | 0.082          | 0.89[0.79-1.01] | --             |
| I    | X-153334755            | 153334755 | MECP2 | C             | 3.3%          | 3.3%           | 0.861          | 1.03[0.77-1.36] | --             |
| I    | rs7877644              | 153338287 | MECP2 | A             | 18.0%         | 19.1%          | 0.177          | 0.91[0.80-1.04] | --             |
| I    | rs113881950            | 153340281 | MECP2 | A             | 19.4%         | 21.0%          | 0.071          | 0.89[0.79-1.01] | --             |
| I    | rs1734792 <sup>b</sup> | 153341060 | MECP2 | A             | 24.6%         | 23.1%          | 0.134          | 1.10[0.97-1.24] | --             |
| I    | X-153341464            | 153341464 | MECP2 | C             | 7.2%          | 7.2%           | 0.995          | 1.00[0.82-1.22] | --             |
| G    | rs11156611             | 153344174 | MECP2 | A             | 19.4%         | 21.0%          | 0.079          | 0.89[0.79-1.01] | --             |
| I    | rs113162152            | 153346888 | MECP2 | T             | 19.2%         | 20.9%          | 0.061          | 0.89[0.78-1.01] | --             |
| I    | X-153347054            | 153347054 | MECP2 | G             | 3.3%          | 3.3%           | 0.858          | 1.03[0.77-1.36] | --             |
| I    | rs5987204              | 153347588 | MECP2 | A             | 19.2%         | 20.9%          | 0.061          | 0.89[0.78-1.01] | --             |
| G    | rs2239464 <sup>b</sup> | 153348431 | MECP2 | A             | 54.9%         | 55.6%          | 0.517          | 0.97[0.87-1.07] | --             |
| G    | rs5987205              | 153348586 | MECP2 | G             | 19.3%         | 20.9%          | 0.071          | 0.89[0.79-1.01] | --             |
| I    | rs17091232             | 153348682 | MECP2 | C             | 6.6%          | 7.4%           | 0.207          | 0.88[0.72-1.07] | --             |
| G    | rs5986954              | 153349295 | MECP2 | G             | 17.5%         | 18.3%          | 0.132          | 0.90[0.79-1.03] | --             |
| I    | rs5945393              | 153349428 | MECP2 | G             | 47.2%         | 47.5%          | 0.665          | 0.98[0.88-1.08] | --             |
| I    | rs5986955              | 153349494 | MECP2 | G             | 17.9%         | 18.9%          | 0.180          | 0.92[0.80-1.04] | --             |
| I    | rs12011603             | 153354062 | MECP2 | T             | 3.4%          | 3.5%           | 0.826          | 0.97[0.74-1.28] | --             |

| Type | SNP         | Position  | Gene         | Tested allele | Frequency     |                | P            | OR              | P <sub>c</sub> |
|------|-------------|-----------|--------------|---------------|---------------|----------------|--------------|-----------------|----------------|
|      |             |           |              |               | SLE (n=1,674) | CTRL (n=1,920) |              |                 |                |
| I    | rs12390791  | 153355759 | <i>MECP2</i> | A             | 19.3%         | 20.9%          | 0.065        | 0.89[0.79-1.01] | --             |
| G    | rs12390885  | 153356015 | <i>MECP2</i> | A             | 19.3%         | 21.0%          | 0.066        | 0.89[0.79-1.01] | --             |
| G    | rs35609266  | 153358115 | <i>MECP2</i> | T             | 21.3%         | 23.0%          | 0.078        | 0.90[0.80-1.01] | --             |
| I    | rs28458447  | 153359700 | <i>MECP2</i> | C             | 19.0%         | 20.7%          | 0.065        | 0.89[0.78-1.01] | --             |
| I    | rs33976460  | 153360669 | <i>MECP2</i> | A             | 17.6%         | 18.7%          | 0.159        | 0.91[0.80-1.04] | --             |
| I    | rs7050893   | 153363595 |              | T             | 2.9%          | 3.9%           | <b>0.025</b> | 0.73[0.55-0.96] | 0.04           |
| G    | rs10126881  | 153365761 |              | G             | 6.6%          | 6.7%           | 0.801        | 0.97[0.80-1.19] | --             |
| I    | X-153366830 | 153366830 |              | C             | 17.6%         | 18.7%          | 0.159        | 0.91[0.80-1.04] | --             |
| I    | rs28781958  | 153366846 |              | T             | 17.6%         | 18.7%          | 0.159        | 0.91[0.80-1.04] | --             |
| I    | rs28876812  | 153366850 |              | T             | 17.6%         | 18.7%          | 0.159        | 0.91[0.80-1.04] | --             |
| I    | rs5987207   | 153366927 |              | C             | 17.6%         | 18.7%          | 0.159        | 0.91[0.80-1.04] | --             |
| I    | rs5986956   | 153367689 |              | A             | 17.6%         | 18.7%          | 0.159        | 0.91[0.80-1.04] | --             |
| I    | rs111354059 | 153368909 |              | G             | 19.0%         | 20.7%          | 0.065        | 0.89[0.78-1.01] | --             |
| I    | rs112724831 | 153368930 |              | G             | 19.0%         | 20.7%          | 0.065        | 0.89[0.78-1.01] | --             |
| I    | rs5987208   | 153369611 |              | A             | 17.6%         | 18.7%          | 0.159        | 0.91[0.80-1.04] | --             |
| I    | rs7058768   | 153372519 |              | G             | 19.0%         | 20.7%          | 0.065        | 0.89[0.78-1.01] | --             |
| I    | X-153372840 | 153372840 |              | T             | 16.7%         | 17.8%          | 0.138        | 0.90[0.79-1.03] | --             |
| I    | rs5987211   | 153376055 |              | T             | 17.8%         | 19.6%          | <b>0.048</b> | 0.88[0.77-1.00] | 0.11           |

If  $P < 0.05$ , it is highlighted in bold and italic.



Type of file: table

Label: S5

Filename: TableS5.doc



Type of file: table

Label: S6

Filename: TableS6.doc

**Table S6. Samples used in previous studies**

|    | Sawalha et al [6] |         | Jacob et al [7] |         |
|----|-------------------|---------|-----------------|---------|
|    | Case              | Control | Case            | Control |
| EA | 684               | 966     | 2001            | 2153    |
| AS | 609               | 706     | 572             | 517     |
| AA | 0                 | 0       | 691             | 386     |
| HA | 0                 | 0       | 514             | 164     |
